# Supplementary material for: Balanced Growth project: a protocol of a single-centre observational study on the involvement of the vestibular system in a child’s motor and cognitive development
Source: PubMed Central journal article supplement — BMJ Open. 2021 Jun 11;11(6):e049165. doi: 10.1136/bmjopen-2021-049165 (PMC8202106; doi:10.1136/bmjopen-2021-049165), 2021-06-11
Supplement: bmjopen-2021-049165.draft_revisions.pdf [file bmjopen-2021-049165.draft_revisions.pdf]

# BMJ Open

BMJ Open is committed to open peer review. As part of this commitment we make the peer review history of every article we publish publicly available.

When an article is published we post the peer reviewers' comments and the authors' responses online. We also post the versions of the paper that were used during peer review. These are the versions that the peer review comments apply to.

The versions of the paper that follow are the versions that were submitted during the peer review process. They are not the versions of record or the final published versions. They should not be cited or distributed as the published version of this manuscript.

BMJ Open is an open access journal and the full, final, typeset and author-corrected version of record of the manuscript is available on our site with no access controls, subscription charges or pay-per-view fees (<http://bmjopen.bmj.com>).

If you have any questions on BMJ Open's open peer review process please email [info.bmjopen@bmj.com](mailto:info.bmjopen@bmj.com)

# BMJ Open

## The Balanced Growth project: the involvement of the vestibular system in a child's motor and cognitive development.

|                               |                                                                                                                                                                                                                                                                                                                                                                                                                                                                                                                                                                                                                                                                                                                                                                                                                                                                                                                                                                                                                                                                                                                                                                                                                                                                                    |
|-------------------------------|------------------------------------------------------------------------------------------------------------------------------------------------------------------------------------------------------------------------------------------------------------------------------------------------------------------------------------------------------------------------------------------------------------------------------------------------------------------------------------------------------------------------------------------------------------------------------------------------------------------------------------------------------------------------------------------------------------------------------------------------------------------------------------------------------------------------------------------------------------------------------------------------------------------------------------------------------------------------------------------------------------------------------------------------------------------------------------------------------------------------------------------------------------------------------------------------------------------------------------------------------------------------------------|
| Journal:                      | <i>BMJ Open</i>                                                                                                                                                                                                                                                                                                                                                                                                                                                                                                                                                                                                                                                                                                                                                                                                                                                                                                                                                                                                                                                                                                                                                                                                                                                                    |
| Manuscript ID                 | bmjopen-2021-049165                                                                                                                                                                                                                                                                                                                                                                                                                                                                                                                                                                                                                                                                                                                                                                                                                                                                                                                                                                                                                                                                                                                                                                                                                                                                |
| Article Type:                 | Protocol                                                                                                                                                                                                                                                                                                                                                                                                                                                                                                                                                                                                                                                                                                                                                                                                                                                                                                                                                                                                                                                                                                                                                                                                                                                                           |
| Date Submitted by the Author: | 17-Jan-2021                                                                                                                                                                                                                                                                                                                                                                                                                                                                                                                                                                                                                                                                                                                                                                                                                                                                                                                                                                                                                                                                                                                                                                                                                                                                        |
| Complete List of Authors:     | <p>Van Hecke, Ruth ; Ghent University Faculty of Medicine and Health Sciences, Department of Rehabilitation Sciences</p> <p>Deconinck, Frederik J. A.; Ghent University Faculty of Medicine and Health Sciences, Department of Movement and Sports Sciences</p> <p>Wiersema, Jan R.; Ghent University Faculty of Psychology and Educational Sciences, Department of Experimental Clinical and Health Psychology</p> <p>Clauws, Chloe; Ghent University Faculty of Medicine and Health Sciences, Department of Rehabilitation Sciences</p> <p>Danneels, Maya; Ghent University Faculty of Medicine and Health Sciences, Department of Rehabilitation Sciences</p> <p>Dhooge, Ingeborg; University Hospital Ghent, Department of Otorhinolaryngology; Ghent University Faculty of Medicine and Health Sciences, Department of Head and Skin</p> <p>Leysens, Laura; Ghent University Faculty of Medicine and Health Sciences, Department of Rehabilitation Sciences</p> <p>Van Waelvelde, Hilde; Ghent University Faculty of Medicine and Health Sciences, Department of Rehabilitation Sciences</p> <p>Maes, Leen; Ghent University Faculty of Medicine and Health Sciences, Department of Rehabilitation Sciences; University Hospital Ghent, Department of Otorhinolaryngology</p> |
| Keywords:                     | Audiology < OTOLARYNGOLOGY, Paediatric otolaryngology < OTOLARYNGOLOGY, PAEDIATRICS, REHABILITATION MEDICINE, PSYCHIATRY                                                                                                                                                                                                                                                                                                                                                                                                                                                                                                                                                                                                                                                                                                                                                                                                                                                                                                                                                                                                                                                                                                                                                           |
|                               |                                                                                                                                                                                                                                                                                                                                                                                                                                                                                                                                                                                                                                                                                                                                                                                                                                                                                                                                                                                                                                                                                                                                                                                                                                                                                    |

SCHOLARONE™  
Manuscripts

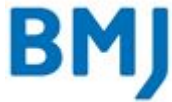

I, the Submitting Author has the right to grant and does grant on behalf of all authors of the Work (as defined in the below author licence), an exclusive licence and/or a non-exclusive licence for contributions from authors who are: i) UK Crown employees; ii) where BMJ has agreed a CC-BY licence shall apply, and/or iii) in accordance with the terms applicable for US Federal Government officers or employees acting as part of their official duties; on a worldwide, perpetual, irrevocable, royalty-free basis to BMJ Publishing Group Ltd ("BMJ") its licensees and where the relevant Journal is co-owned by BMJ to the co-owners of the Journal, to publish the Work in this journal and any other BMJ products and to exploit all rights, as set out in our [licence](#).

The Submitting Author accepts and understands that any supply made under these terms is made by BMJ to the Submitting Author unless you are acting as an employee on behalf of your employer or a postgraduate student of an affiliated institution which is paying any applicable article publishing charge ("APC") for Open Access articles. Where the Submitting Author wishes to make the Work available on an Open Access basis (and intends to pay the relevant APC), the terms of reuse of such Open Access shall be governed by a Creative Commons licence – details of these licences and which [Creative Commons](#) licence will apply to this Work are set out in our licence referred to above.

Other than as permitted in any relevant BMJ Author's Self Archiving Policies, I confirm this Work has not been accepted for publication elsewhere, is not being considered for publication elsewhere and does not duplicate material already published. I confirm all authors consent to publication of this Work and authorise the granting of this licence.

## The Balanced Growth project: the involvement of the vestibular system in a child's motor and cognitive development.

Ruth Van Hecke<sup>1</sup>, Frederik J.A. Deconinck<sup>2</sup>, Jan R. Wiersema<sup>3</sup>, Chloe Clauws<sup>1</sup>, Maya Danneels<sup>1</sup>, Ingeborg Dhooge<sup>4,5</sup>, Laura Leyssens<sup>1</sup>, Hilde Van Waelvelde<sup>1</sup>, and Leen Maes<sup>1,4</sup>

<sup>1</sup> Ghent University, Department of Rehabilitation Sciences, Ghent, Belgium

<sup>2</sup> Ghent University, Department of Movement and Sports Sciences, Ghent, Belgium

<sup>3</sup> Ghent University, Department of Experimental Clinical and Health Psychology, Ghent, Belgium

<sup>4</sup> Ghent University Hospital, Department of Otorhinolaryngology, Ghent, Belgium

<sup>5</sup> Ghent University, Department of Head and Skin, Ghent, Belgium

### Corresponding author:

Ruth Van Hecke

Corneel Heymanslaan 10, 9000 GENT, Belgium

+3293322296

E-mail: ruth.vanhecke@ugent.be

**Keywords:** vestibular dysfunction, motor performance, cognition, neurodevelopmental disorders, children

**Word count:** 6007

## ABSTRACT

**Introduction** The involvement of the vestibular system in the motor and higher (cognitive) performances of typically developing or vestibular-impaired children is currently unknown or has only scarcely been explored. Interestingly, arguments for an interaction between vestibular, motor, and cognitive functions in children can also be supported by research on children known for their difficulties in motor and/or cognitive processing (e.g. children with neurodevelopmental disorders (NDD)), as they often present with vestibular-like characteristics. Therefore, in order to elucidate this interaction, and to increase the understanding of the pathophysiology and symptomatology of vestibular disorders and NDD in children, the Balanced Growth project was developed. It includes the following objectives: [1] to understand the association between motor skills, cognitive performances, and the vestibular function in typically developing school-aged children, with special focus on the added value of the vestibular system in higher cognitive skills and motor competence; [2] to investigate whether a vestibular dysfunction (with/without an additional auditory disease) has an impact on motor skills, cognitive performances, and motor-cognitive interactions in children, and [3] to assess if an (additional) underlying vestibular dysfunction can be identified in school-aged children with NDD, with documentation of the occurrence and characteristics of vestibular dysfunctions in this group of children using an extensive vestibular test battery.

**Methods and analysis** In order to achieve the objectives of the Balanced Growth project, a single- and dual-task test protocol was created, which will be performed in three groups of school-aged children (6 – 12 years old): (1) a typically developing group (n = 140), (2) (audio)vestibular-impaired children (n = 30), and (3) children with a NDD diagnosis (n = 55) (i.e. autism spectrum disorder, attention deficit/hyperactivity disorder and/or developmental coordination disorder). The test protocol consists of several custom-made tests and already existing validated test batteries and includes a vestibular assessment, an extensive motor assessment, eight neurocognitive tests, a cognitive-motor interaction assessment, and includes also additional screenings to control for potential confounding factors (e.g. hearing status, intelligence, physical activity, etc.).

**Ethics and dissemination** The current study was approved by the ethics committee of Ghent University Hospital on June 4th 2019 with registration number B670201940165 and is registered at Clinical Trials (clinicaltrials.gov) with identifier NCT04685746. All research findings will be disseminated in peer-reviewed journals and presented at vestibular as well as multidisciplinary international conferences and meetings.

**Trial registration number** ClinicalTrials.gov Registry NCT04685746

## STRENGTHS AND LIMITATIONS OF THIS STUDY

- To our knowledge, this is the first extensive study assessing the interaction between vestibular, motor, and cognitive functions in typically developing children on the one hand, and vestibular-impaired children and children with a neurodevelopmental (NDD) diagnosis on the other hand.
- The Balanced Growth protocol consists of a very extensive vestibular, motor and cognitive test protocol, which also includes additional screenings to control for a lot of important confounding factors (e.g. hearing status, intelligence, static/dynamic visual acuity, physical activity, comorbidity, etc.).
- Ultimately, it is expected that this project may result in optimized diagnostic and treatment procedures for the vestibular and NDD populations, which is of great importance for their quality of life.
- Due to its innovative character, this study includes a mainly exploratory design in the (heterogeneous) NDD group, and may, therefore, result in preliminary conclusions only.

## INTRODUCTION

The balance system is a complex sensorimotor system which comprises the peripheral vestibular apparatus, the somatosensory and visual system, brainstem, cerebellum and the cortex. The peripheral portion of the vestibular system is located in the inner ear and consists of three semicircular canals (SCC) and two otolith organs providing complementary information about rotational and translational head movements relative to gravity. It provides postural control and a stabilized vision during head movements, which are reflexively maintained by the vestibulo-ocular (VOR), vestibulo-spinal and vestibulo-cervical reflexes. In addition, together with centrally integrated proprioceptive and visual stimuli, the vestibular system gives an internal representation of the environment and movements through it<sup>1-3</sup> (Figure 1).

The contribution of the vestibular apparatus in the primary, reflexive functions of the vestibular system has been extensively studied, especially in a clinical adult population with vestibular impairments<sup>4-7</sup>. Also in children, the effect of a vestibular impairment on postural control, gaze stabilization and the attainment of motor developmental milestones has been described before<sup>8</sup>. The first studies on this topic mainly focused on the motor development and balance function in very young (< 2 years) children<sup>9-11</sup> and/or children with sensorineural hearing loss (SNHL) and a vestibular dysfunction<sup>12-16</sup>. Later on, several studies have linked these motor and balance problems to vestibular outcome measures and could demonstrate that motor performances were even more impaired when a vestibular dysfunction was superimposed to the auditory dysfunction<sup>17-21</sup>. Although literature on this topic has emerged the last decade, several questions still remain unanswered. Most studies focused on specific balance functions in children with audiovestibular dysfunctions, while studies on the impact on fine motor skills, for which an adequate VOR-function is needed, or on motor tasks that are less dependent on the balance system are rather scarce<sup>22</sup>. In addition, literature on the impact of more specific conditions, such as unilateral or partial vestibular loss (e.g. SCC dysfunctions vs an otolith impairment), or research into the role of etiology or timing of the vestibular dysfunction (e.g. before or after the motor milestones were achieved) on the development of motor competence is limited or even non-existing<sup>17 23 24</sup>. These gaps in the current literature warrant further research, which can also be supported by the fact that an adequate vestibular rehabilitation approach at a young age is suggested to be beneficial<sup>3 25 26</sup>. Although motor competence has been extensively studied in typically developing children, an association between vestibular function testing and a child's motor development has never been studied in a healthy pediatric cohort before. This knowledge is, however, considered to be key to a better understanding of the impact of the vestibular system on a child's motor development.

Besides the involvement of the vestibular system in balance and postural performances and other reflexive primary functions, growing evidence is highlighting its important role in higher (cognitive) functions as well<sup>27 28</sup> (Figure 1). In relation to that, several studies demonstrated a widespread ascending vestibular network throughout the cerebral (sub)cortex involved in cognitive, social and emotional processing that goes far beyond the reflexive brainstem circuitry<sup>29 30</sup>, which may explain the influence

1  
2  
3 1 of vestibular impairments on cognitive, psychosocial and educational skills in children. For example, it  
4 2 has been suggested that vestibular impairments may be linked to reduced visuo-spatial abilities,  
5 3 attentional deficits, poor reading skills, etc.<sup>27 31-34</sup>, , which are often reported by the patient's (or their  
6 4 parents') as well. These hypotheses on the vestibulo-cognitive interaction in literature, however, are  
7 5 mainly based on animal studies, imaging and clinical studies in healthy and vestibular-impaired adults<sup>27-</sup>  
8 6 <sup>30 35-40</sup>. Currently, only one study in the pediatric vestibular patient population supports the vestibulo-  
9 7 cognitive interaction in children. Lacroix and colleagues<sup>32</sup> assessed four neuropsychological functions  
10 8 in thirteen vestibular-impaired participants with a mean age of ten years and five months (specific age  
11 9 information is lacking). Although the selective visual attention task did not reveal any differences, the  
12 10 vestibular-impaired group had significantly lower scores on the visuospatial working memory, mental  
13 11 rotation, and space orientation tasks compared to a group of sixty typically developing peers. The study,  
14 12 however, had several limitations, which urge for further research. For example, the use of a limited or  
15 13 heterogeneous vestibular test battery (in some of the participants), not taking into account hearing status  
16 14 as an important confounding factor, and the use of tests that may have resulted in floor or ceiling effects  
17 15 were reported. In addition, objective vestibular function testing in the control group was not  
18 16 reported/performed, and the authors only included cognitive tasks in a single-task condition, while a  
19 17 dual-task setting may be an important added value in a vestibular-impaired population<sup>41 42</sup>. To our  
20 18 knowledge, the vestibulo-cognitive interactions have never been assessed in a typically developing  
21 19 cohort.

22 20 Interestingly, arguments for an interaction between vestibular, motor, and cognitive functions  
23 21 in children can also be supported by research on children known for their difficulties in motor and/or  
24 22 cognitive processing (e.g. children with neurodevelopmental disorders (NDD)), as they often present  
25 23 with vestibular-like characteristics<sup>31</sup>. For example, it has been repeatedly reported that children with  
26 24 NDD often have more difficulties in balance and postural stability, compared to their typically  
27 25 developing peers, especially in conditions where vestibular feedback was the sole accurate source of  
28 26 sensory information<sup>43-46</sup>. Unfortunately, research on the vestibular function in children with NDD is  
29 27 scarce, lacks quality and/or does not use an extensive vestibular test battery including recent assessment  
30 28 techniques (see a recent systematic review for more details<sup>31</sup>). In addition, none of the current studies  
31 29 investigating vestibular function in a NDD population, linked the vestibular responses with cognitive  
32 30 and/or motor outcome measures.

33 31 Therefore, to increase the understanding of the pathophysiology and symptomatology of  
34 32 vestibular disorders (and neurodevelopmental disorders) in children, the Balanced Growth project was  
35 33 developed. This project aims to elucidate the relationship with and the involvement of the vestibular  
36 34 system in children's cognitive and motor performances. It includes the following objectives: [1] to  
37 35 understand the association between motor skills, cognitive performances, and the vestibular function in  
38 36 typically developing school-aged children, with special focus on the added value of the vestibular system  
39 37 in higher cognitive skills and motor competence; [2] to investigate whether there is an association



1  
2  
3  
4  
5  
6  
7  
8  
9  
10  
11  
12  
13  
14  
15  
16  
17  
18  
19  
20  
21  
22  
23  
24  
25  
26  
27  
28  
29  
30  
31  
32  
33  
34  
35  
36  
37  
38  
39  
40  
41  
42  
43  
44  
45  
46  
47  
48  
49  
50  
51  
52  
53  
54  
55  
56  
57  
58  
59  
60

1 between a vestibular dysfunction (with/without an additional auditory disease), motor skills, cognitive  
2 performances, and motor-cognitive interactions in children, and [3] to assess if an (additional)  
3 underlying vestibular dysfunction can be identified in school-aged children with NDD, with  
4 documentation of the occurrence and characteristics of vestibular dysfunctions in this group of children  
5 using an extensive vestibular test battery. Ultimately, it is expected that this project may result in  
6 optimized diagnostic and treatment procedures for these populations, which is of great importance for  
7 their quality of life.

8

For peer review only

## METHODS AND ANALYSIS

### Study protocol and setting

In order to achieve the objectives of the Balanced Growth project, a vestibular, motor and cognitive single- and dual-task test protocol was created, based on a combination of several custom-made tests and already existing validated test batteries. This project is a collaboration between the departments of rehabilitation, psychological, medical and movement sciences of the Ghent University and the otolaryngology department of the Ghent University Hospital.

The data collection for the first two objectives of this project started in July 2019 and the project will end in October 2023. The first exploratory study focusing on the impact of a vestibular dysfunction on the cognitive development of children with a uni- or bilateral vestibular dysfunction, irrespective of their hearing status (objective 2), is expected to be submitted for publication in February 2021. However, data collection in the context of objective 2 will continue until March 2023 in order to additionally assess the impact on motor development and on cognitive-motor interference in comparison with typically developing on the one hand and auditory-impaired children (without a vestibular dysfunction) on the other hand, both matched for age, (hearing loss), gender, handedness and randomization order. Since the study in the typically developing group (objective 1) requires more participants (cfr. sample sizes), this study is planned to be finished by November 2022. Currently (January 2021), 130 examination sessions were completed ( $n = 65$ ). The last study (objective 3) was planned to be initiated in June 2020, however, due to the COVID-19 pandemic, the start of this study was postponed to June 2021, of which the last data collection is foreseen in June 2022.

### Eligibility criteria and recruitment procedure

Three groups of school-aged children (6 – 12 years old) will be included in the Balanced Growth study: (1) a typically developing group, (2) (audio)vestibular-impaired children, and (3) children with a NDD diagnosis.

The typically developing cohort is recruited through convenience sampling with the help of schools (in the region of Ghent, Flanders). All 6-to-12 year old children are deemed eligible, however, children with hearing, vestibular, neurodevelopmental, psychiatric and/or musculoskeletal disorders, known to the parent or legal guardian and assessed using questionnaires (cfr. *Infra*), are excluded. In addition, children with an estimated intelligence score lower than 70 (cfr. *infra*) are also excluded from the healthy group.

The children with (audio)vestibular dysfunctions are recruited from the otolaryngology department of the Ghent University Hospital. Every child between six and twelve years old diagnosed with an (audio)vestibular dysfunction and recently (< 6 months) tested with an extensive auditory and vestibular test battery, is invited to participate in our Balanced Growth study. At the otolaryngology department, the vestibular diagnosis is well-established by the use of an extensive and age-appropriate vestibular test protocol. It includes an anamnestic procedure, an oculomotor, a rotatory and caloric (water) irrigation

1 test, a video Head Impulse Test (vHIT) in all planes of the semicircular canals (SCC), and a cervical  
 2 (air-conduction) and ocular (using a minishaker) Vestibular Evoked Myogenic Potential (c/oVEMP)  
 3 assessment. The group of children with an isolated hearing impairment (objective 2), are also recruited  
 4 at the Ghent University Hospital, matched for their hearing loss to the (audio)vestibular-impaired group.  
 5 The study participants in objective 3, i.e. children with a NDD diagnosis, will be recruited at special  
 6 school services, rehabilitation centers, centers for developmental disorders, and by private physical  
 7 therapists. Neurodevelopmental disorders are a heterogeneous group of psychiatric conditions arising  
 8 early in life and characterized by developmental deficits<sup>47</sup>. These deficits include, amongst others,  
 9 dysfunctions in cognitive processes (e.g. attention, impulsivity), speech (e.g. stuttering), (psycho)social  
 10 skills (e.g. non-verbal communication, social reciprocity), and motor coordination. In the context of the  
 11 current project, only children with the common and often co-occurring Autism Spectrum Disorder  
 12 (ASD), Attention Deficit Hyperactivity Disorder (ADHD), and/or Developmental Coordination  
 13 Disorder (DCD) diagnosis will be included. All participants and their parents will first receive  
 14 comprehensive oral and written information on the objectives and procedures of the study.

### 15 Sample size

16 The sample size of the *typically developing group* was arbitrarily defined as a minimum of 140  
 17 participants (at least 20 subjects per age over the age range of 6 – 12 years old), since an appropriate  
 18 sample size calculation could not be based on previous literature.

19 Two studies were consulted to serve as input for the sample size calculation of *the vestibular-*  
 20 *impaired group*<sup>20 32</sup>. These studies assessed the impact of a vestibular dysfunction on the motor  
 21 (backward balance beam walking)<sup>20</sup> and cognitive performances (spatial span task)<sup>32</sup> in children, and  
 22 correspond best to the second objective of the current research project. Table 1 depicts all input values  
 23 for the calculation. Both studies resulted in a power of 0.8 (SAS Power and Sample Size tool). However,  
 24 given the current pool of patients at the Ghent University Hospital, and taking into account possible  
 25 dropout, the authors aim at 30 vestibular-impaired children to be included in this study.

26 *Table 1. Input values for the sample size calculation of the vestibular-impaired group (objective 2).*

| Study                 | Parameter            | Groups                                  | Means | standard deviation | $\alpha$ level   | Sample size | Power level |
|-----------------------|----------------------|-----------------------------------------|-------|--------------------|------------------|-------------|-------------|
| Maes et al. (2014)    | Motor quotient (KTK) | Control group                           | 90    | 13,78              | $\alpha = 0.05$  | N = 12      | 0.8         |
|                       |                      | Experimental group (vesibular-impaired) | 63,17 | 6,45               |                  | N = 12      |             |
| Lacroix et al. (2020) | Spatial span         | Control group                           | 8.2   | 2.3                | $\alpha = 0.027$ | N = 60      | 0.8         |
|                       |                      | Experimental group (vesibular-impaired) | 6.3   | 1.9                |                  | N = 13      |             |

27  
 28 The power analysis for the *NDD population* was performed based on the study of Lotfi et al.  
 29 (2017)<sup>48</sup>, in which vestibular examination was completed in a group of 33 children with NDD (i.e.

ADHD). The sample size calculation was based on the rotatory chair gain, a parameter which is considered to be a key measure in vestibular research for the detection of the horizontal semicircular canal function (mid-frequency function), and which was implemented in the current protocol as well. The authors observed a significant increase ( $\alpha = 0.001$ ; independent sample t-test; power < 20%) in the experimental group (mean: 49.16; SD: 13.86) compared to the control group (mean: 43.60; SD: 9.89) for the outcome parameter 'gain at 0.01 Hz'. In order to achieve significant differences with an appropriate power (accepting an  $\alpha$  level of 0.05 and a power level of 0.8), this calculation resulted in a sample size of 51 participants. Taking into account possible drop outs, it is foreseen to include 55 NDD participants.

### Outcome measures

The Balanced Growth protocol consists of vestibular, cognitive, motor, and cognitive-motor interaction assessments, and includes also several additional screenings to control for potential confounding factors (Figure 2).

The screenings include an auditory, an intelligence, and an ophthalmological screening, and an anamnestic and several validated questionnaires (cfr. infra). After parental permission and their written informed consent, each participant will be invited for two separate test moments, which will take one hour and a half each. During the first session, the cognitive-motor interaction, the overall motor performance, vestibular, auditory, and ophthalmological function will be assessed. During the second moment, an intelligence screening and an extensive neuropsychological investigation will be performed. To avoid fatigue, the latter test moment will only be executed in the morning and the two sessions will never take place on the same day. The parents will be asked to fill in the questionnaires during one of the two appointments.

### Vestibular assessment

Each vestibular organ consists of five parts, two otolith organs (utricle and saccule) and three SCCs (lateral, anterior and posterior SCC). To obtain information on the functionality of these five parts, all participants will be assessed with a vHIT, cVEMP, and oVEMP test (Figure 3).

Firstly, the vHIT will be executed, which assesses the superior and inferior vestibular nerve and the functioning of the six semicircular canals for high-frequency movements, using the vestibulo-ocular reflex (VOR). vHIT measurements will be conducted using the ICS Impulse system (GN Otometrics, Taastrup, Denmark) and accompanying software 'Otosuite'. Before each vHIT assessment, the goggles will be configured and individualized by a calibration procedure (15° saccades in horizontal plane) and an additional calibration check (i.e. evaluating if the eye and head velocity traces match while slowly rotating the head). To avoid slippage of the goggles, the elastic band will be tightened firmly on the head and will not be touched while performing the impulses. The children will subsequently be instructed to sit on a chair and fixate an attractive visual target (i.e. movie on a tablet) at 1.50 m distance. Meanwhile,

1  
2  
3 1 an examiner, experienced in pediatric vestibular function testing, will perform unpredictable head  
4 2 movements (10° - 20° amplitude) in, respectively, the horizontal, LARP (to stimulate the left anterior  
5 3 and right posterior canal), and RALP plane (to stimulate the right anterior and left posterior canal). To  
6 4 facilitate a smooth registration of the pupil, the measurements will be conducted in a well-lit room. Prior  
7 5 to interpretation of the results, the data will be thoroughly cleaned according to the following criteria:  
8 6 (1) head velocity between 120 (vertical) or 150 (horizontal) and 250 °/s and (2) head bounce below 25  
9 7 % of the peak head velocity<sup>49,50</sup>. Records with very noisy eye traces or clear eye blinks will be excluded,  
10 8 based on the video recording. After this data cleaning, at least 10 accepted impulses in each direction  
11 9 will be included. The measured gain (of the VOR) (%), the symmetry between the left and right side  
12 10 (%), and the presence of covert/overt saccades (n, and % of the performed HITs) will be taken as  
13 11 outcome measures of this test.

14 12 The integrity of the saccule and the inferior vestibular nerve (by means of the vestibulo-cervical  
15 13 reflex, VCR), will be investigated by a *cVEMP test*, using the Neuro-Audio equipment (version 2010,  
16 14 Neurosoft, Ivanovo, Russia) and accompanying software. For the cVEMP, air-conducted 500 Hz tone  
17 15 bursts of 95 dBnHL will be presented monaurally through insert earphones to elicit the responses, and  
18 16 the response will be measured using four small self-adhesive surface electrodes (Blue Sensor, Ambu)  
19 17 applied on the upper 1/3rd part of the sternocleidomastoid muscle (SCM) (active), on the sternum just  
20 18 beneath the interclavicular ligament (reference), and on the nasion (ground). Contraction of the SCM  
21 19 muscle, necessary for this examination, will be achieved by lifting and rotating the child's head to the  
22 20 non-stimulus side in supine position. Outcome measures that will be included in the database are the  
23 21 absolute latencies of P1 and N1 (ms), rectified interpeak amplitude, asymmetry ratio (%), and  
24 22 absence/presence of the cVEMP-response. The *oVEMP test*, which is carried out with the same Neuro-  
25 23 Audio equipment, will be used to examine the functioning of the utricle and the superior vestibular nerve  
26 24 (by means of the VOR). To provoke this specific VOR-response, a mini-shaker (500 Hz stimulus (2-2-  
27 25 2 ms) with an intensity of 140 dB force level) will be used. In supine position, an upward gaze of 30°  
28 26 will be ensured by a fixation mark on the ceiling. If necessary, a smartphone playing a movie will be  
29 27 attached to the wall to elicit the upward gaze. The responses will be measured using electrodes on the  
30 28 inferior oblique muscle just below the lateral canthus of the eye, the reference electrode next to the  
31 29 medial eye canthus on the nose, and the common electrode on the nasion<sup>51</sup>. The absolute latencies of N1  
32 30 and P1 (ms), interpeak amplitude (µV), asymmetry ratio (%) and absence/presence of the oVEMP-  
33 31 response will be the reported outcome measures.

34 32 Although the vestibular-impaired children (objective 2) will already have been extensively  
35 33 tested for their vestibular function at the Ghent University Hospital (cfr. supra), they will receive an  
36 34 additional vestibular screening similar to the one above, to ensure the same test conditions (e.g.  
37 35 examiner, test location, etc.) as the other two groups and to evaluate possible aberrations compared to  
38 36 the last comprehensive test moment in the hospital. The latter may be possible in several fluctuating  
39 37 vestibular disorders (e.g. vestibular dysfunction as a result of a congenital Cytomegalovirus infection).

1  
2  
3 1 In the NDD group (objective 3), *rotatory chair testing* including a visual suppression test will  
4 2 be included as well. The rotatory chair test (version 1.70; Toennies Nystagliner, Höchberg, Germany),  
5 3 a sinusoidal harmonic acceleration test (SHAT), investigates the superior vestibular nerve and horizontal  
6 4 canal function for mid-frequency movements. The child will be asked to sit on an age-appropriate  
7 5 adapted rotatory chair<sup>52</sup>, with the head fixated by a neck pillow and headband. While the rotatory chair  
8 6 will start to move, the examiner will continuously talk with the participants, keeping the children  
9 7 comforted but alert. Alertness will be stimulated by age-appropriate mathematical exercises. The test  
10 8 will be performed at 0.16, 0.04 and 0.01 Hz, consecutively, with a peak velocity of 60 degrees per  
11 9 second. Lastly, in order to assess visual suppression of the VOR and central vestibular function as well,  
12 10 one extra condition at 0.16 Hz will be performed with a small light source attached to the chair in front  
13 11 of the child. Electronystagmography software will be used to register horizontal as well as vertical eye  
14 12 movements, with electrodes placed bitemporally and a ground electrode on the forehead to register  
15 13 horizontal eye movements. A monocular infra- and supraorbital electrode placement will be adopted to  
16 14 monitor eye blinks. The response parameters gain (%), phase (°) and asymmetry (%) will be calculated<sup>53</sup>.

#### 15 *Motor assessment*

16 16 To investigate motor competence, a validated motor test will be applied, the *Movement Assessment*  
17 17 *Battery for Children*, 2<sup>nd</sup> edition – Dutch version (M ABC 2 NL<sup>54</sup>). This test battery is one of the most  
18 18 widely used assessment tools to evaluate a child's (3 - 17 years old) motor performance, which involves  
19 19 children completing eight fine and gross motor tasks grouped in three categories: fine motor skills,  
20 20 aiming and catching, and balance. These eight different and age-appropriate tasks will be executed in  
21 21 accordance to the user manual, and will yield a total score, subscale scores, and item scores<sup>54</sup>.

22 22 Within the scope of the current project and to obtain more detailed information on dynamic and  
23 23 static balance function, the backward balance beam walking subtest of the *Körperkoordination Test für*  
24 24 *Kinder (KTK<sup>55</sup>)* and posturography will be performed as well. During the KTK subtest the participants  
25 25 will be asked to walk barefoot and backwards on three balance beams decreasing in width (3 m length -  
26 26 6, 4.5 and 3 cm width, respectively). For each beam, three trials will be executed, preceded by one  
27 27 practice trial. A maximum of 24 steps (8 per trial) will be counted for each balance beam, with a  
28 28 maximum of 72 steps. For the posturographic assessment, the *modified Clinical Test of Sensory*  
29 29 *Interaction on Balance (m-CTSIB<sup>56</sup>)* will be executed, which is designed to assess the static balance  
30 30 performance and the interaction and use of the most important sensory inputs during postural stability  
31 31 (i.e. vision, somatosensory, and vestibular information). During 30 seconds, the participants will be  
32 32 asked to stand barefoot with both feet together (romberg stance) in four different conditions. In condition  
33 33 one, all sensory systems (i.e. vision, somatosensory, and vestibular) will be available for maintaining  
34 34 balance. In condition two, the children will be asked to do the same while blindfolded. In condition  
35 35 three, the romberg stance will have to be performed on a foam pad (Airex AG, Sins, Switzerland, 41 cm  
36 36 × 50 cm × 6 cm). During the fourth and most difficult condition, the participant will be asked to stand



1  
2  
3 1 blindfolded on a foam pad. Each condition will include 3 trials until the maximum amount of 30 seconds  
4 2 is achieved. The trial with the longest duration will be selected for analysis. This test will be performed  
5 3 on a force platform, a Wii Balance Board© (Nintendo Co., Ltd.), using the Colorado University  
6 4 BrainBLoX software<sup>57</sup>. Calculated by a custom-made code in MATLAB (The MathWorks, Inc. Natick,  
7 5 Massachusetts, United States) the following outcome parameters will be included: area under the curve  
8 6 in both anterior-posterior direction and medial-lateral direction, the center of pressure path length (cm),  
9 7 the sway velocity (m/s), and the 95% confidence ellipse area (cm<sup>2</sup>). An overview of the motor test battery  
10 8 is depicted in Figure 4.

## 9 Cognitive assessment

10 Preceded by an intelligence screening (cfr. infra), the cognitive part of the protocol includes eight  
11 neuropsychological tests, which were selected based on the six neurocognitive domains of the DSM-5  
12 (Diagnostic and Statistical Manual of Mental Disorders, Fifth Edition<sup>47</sup>; Perceptual-motor function,  
13 learning and memory, social cognition, language, complex attention, and executive function) (Figure 5).  
14 All included cognitive tests are frequently reported and found to be valid for the intended target  
15 population. Noteworthy, as hearing impairment is often present in several target populations of the  
16 current project (objectives 2 and 3), during all included cognitive tests only non-auditory stimuli will be  
17 used and the neurocognitive domain ‘language’ will not be assessed separately. To avoid learning and  
18 order effects, the cognitive tests will be executed in a Latin square counterbalanced design.

19 A computerized spatial span task, which assesses *visual-spatial short term memory* (learning  
20 and memory – DSM-5), was created using the Psychology Experiment Building Language (PEBL)  
21 software<sup>58</sup>. During this task, administered on a touch screen monitor (Prolite T2253MTS-B1, 22”,  
22 Iiyama, Japan), the participants will see nine squares (3 x 3 cm, resolution 1440 x 900) sequentially  
23 changing colors (stimulus rate: 1000 ms) (Figure 6). They will be asked to reproduce this sequence by  
24 touching the squares with their preferred hand in the same order as the squares were changing colors.  
25 Preceded by three practice items of a two-square sequence, there will be two test trials in each level of  
26 span length, increasing from 2 to 9. The sequence length will be increased by one, following a correct  
27 trial in one of the two trials within a span length, whereas the test will be terminated when the child fails  
28 two consecutive trials at any level of span length. All sequences will be selected randomly from the  
29 software, with the constraint that a square could be included only once in each sequence. The measures  
30 obtained from this cognitive test are: the longest span (n), amount of correct squares (n, %), amount of  
31 incorrect squares (n, %), number of correct trials (n, %), and the response rate (ms).

32 Similar to the previous task, a digit span task was programmed using the PEBL software. In this  
33 task, assessing *visual short term memory* (learning and memory – DSM-5), participants will be  
34 instructed to recall visually presented sequences of digits (1000 ms stimulus interval) by typing the  
35 sequence in the exact order as it appeared. A series of digits in black font (6.4 cm, 1440 x 900 resolution)  
36 will be randomly presented on a monitor (Prolite T2253MTS-B1, 22”, Iiyama, Japan) increasing in

1  
2  
3 1 length (2–9 digits) (Figure 7). With their preferred hand, children will be instructed to repeat the  
4 2 sequence on an adapted keypad (i.e. larger keys). Two trials per level, starting with a sequence of 2  
5 3 digits and gradually increasing to 9 digits, will be presented. Difficulty of the task will increase, if one  
6 4 or both trials are correct. The task will be terminated after an error on both items of one difficulty level.  
7 5 The dependent measures of interest are the length of the longest correct list (digit span, n), number of  
8 6 correct digits (n, %), number of incorrect digits (n, %), number of correct trials (n, %), and mean  
9 7 response rate (ms).

10 8 A child's ability to recognize emotions from facial expressions (social cognition – DSM-5) will  
11 9 be assessed using the *emotion recognition* subtest from the NEPSY-II NL test battery (Developmental  
12 10 Neuropsychological Assessment, Second Edition, Dutch version<sup>59 60</sup>). This non-verbal subtest consists  
13 11 of four tasks that assess the ability to recognize emotions (happy, sad, anger, fear, disgust, and neutral)  
14 12 from photographs of children's faces. During the first condition, the participants will be asked to tell the  
15 13 examiner if the two photographs on display indicate the same emotion. For the second condition, the  
16 14 children will see three or four photographs and will be instructed to select two faces expressing the same  
17 15 feeling. The third condition consists of a task in which the participants will be asked to select one out of  
18 16 four faces from the bottom of the page which represents the same feeling as the face at the top of the  
19 17 page. Finally, one photograph will be shown for 5 seconds, after which the participants will be asked to  
20 18 point out two photographs out of six with the same emotion as the face in the photograph previously  
21 19 shown to them. During this test, a total score (n) ranging from 1 to 25 (6 years) or 1 to 36 (> 6 years)  
22 20 will be reported as outcome measure, with higher scores reflecting better ability to recognize emotions.

23 21 *Visual sustained and selective attention* (complex attention – DSM-5) will be measured using a  
24 22 computerized continuous performance task, programmed in PEBL (Figure 7). In this task, the children  
25 23 will see a sequence of digits (6.4 cm; resolution 1440 x 900) on a computer monitor (Prolite T2253MTS-  
26 24 B1, 22", Iiyama, Japan). The participants will be instructed to press the space bar of the keyboard in  
27 25 front of them with their preferred hand every time they see a digit 9 that is preceded by a digit 1 (GO  
28 26 stimulus), but to suppress a response in any other case. A practice item will first be administered to  
29 27 ensure that the child understands the task. Throughout the task, a total of 540 digits will appear at a rate  
30 28 of 1 per second (total duration: 9 minutes). The digits will be classified into three blocks (180 digits  
31 29 each) with the target (a 1 followed by a 9) occurring 15 times per block. This task results in six outcome  
32 30 variables: [1] omissions (a participant fails to press the button after the target appears) (n), [2]  
33 31 commissions ("false alarm", when a participant presses the button for a non-target) (n), [3] total amount  
34 32 of errors (n), [4] sustained attention which is measured by calculating the change in hit and false alarm  
35 33 rates throughout the task (across the 3 blocks), [5]  $\beta$ , and [6]  $d'$ .  $\beta$  is a measure of the participant's  
36 34 likelihood to press the button for both targets and non-targets and is, therefore, considered a measure of  
37 35 impulsivity, whereas  $d'$  is a global measure of visual selective attention that combines total hits and false  
38 36 alarms<sup>61</sup>.



1  
2  
3 1 The *inhibition* subtest, selected from the NEPSY II NL, will measure the child's ability to inhibit  
4 2 a natural response and to switch between automatic and inhibitory response types (executive function –  
5 3 DSM-5). Black and white shapes or arrows will be shown to the participants, who will be instructed to  
6 4 respond as quickly as possible. The test will be performed in three conditions: "Naming", where the  
7 5 child will be asked to name the shape or say the direction of the arrow without making mistakes;  
8 6 "Inhibition", where the child will have to provide the opposite of the correct response (e.g., say "circle"  
9 7 when a square is presented); and "Switching", where the child will have to switch between providing  
10 8 the correct response and the opposite response depending on the color of the shape or arrow. The  
11 9 dependent measures of interest are: [1] total amount of self-corrected errors during each condition (n),  
12 10 total amount of uncorrected errors during each condition (n), total amount of errors during each  
13 11 condition (n), the time needed to complete each condition (s).

14 12 To assess *visuo-spatial and visual working memory*, categorized by the DSM-5 as executive  
15 13 functions, a backward spatial and digit span task were included in the protocol. With the same  
16 14 experimental setting and outcome variables as the previously mentioned 'spatial span' and 'digit span'  
17 15 tasks, the participants will be instructed to recall digits and sequences of squares as presented on a  
18 16 computer monitor, yet in the reverse order as displayed. Additionally, the span difference between the  
19 17 forward and backward subtask will be calculated as well.

20 18 To limit the overall test duration, but to receive more information on the participants' executive  
21 19 functions, the parent-report questionnaire Behavior Rating Inventory of Executive Function (BRIEF)  
22 20 will be used to assess *executive functions in everyday situations*. The overall score and subscores (n) of  
23 21 this validated questionnaire consisting of 86 items (3-point Likert scale) will be reported as response  
24 22 parameters.

25 23 Lastly, to test *perceptual-motor function* (DSM-5), the validated Beery-Buktenica  
26 24 Developmental Test of Visual-Motor Integration (VMI – 6th edition<sup>62</sup>), and its two supplementary tests  
27 25 (visual perception (VP) and motor coordination (MC)), will be administered. During the VMI, children  
28 26 will be instructed to copy developmentally ordered geometric forms. All 30 items will be scored based  
29 27 on the objective scoring criteria outlined in the user manual, with a maximum score of 30. Additionally,  
30 28 the two supplementary tests VP and MC will be performed as well. They contain the same geometric  
31 29 shapes as used in the VMI test. The VP test focuses on children's ability to visually discriminate by  
32 30 asking them to look at a series of pictures and select the geometric figure that matches a target figure  
33 31 from a series of choices. The MC subtest assesses children's ability to trace forms within the given  
34 32 boundaries. Again, the instructions and scoring principles of the user manual will be applied, which will  
35 33 result in 'total number of correct drawings' (n), 'total number of correct identified forms' (n) and 'total  
36 34 number of correctly completed shapes' (n) as the outcome parameters.

## 1 Cognitive-motor interaction assessment

2 Although the motor and cognitive single-task conditions represent a lot of children's activities of daily  
3 living (e.g. performing cognitive tasks at school in a sitting position), a dual-task assessment,  
4 simultaneously performing a cognitive and motor task, will be included as well to represent activities of  
5 daily living even more accurately in the (audio)vestibular-impaired group (objective 2)<sup>41</sup>. During the  
6 *cognitive-motor interaction* assessment, children will be asked to walk on an adaptive walking treadmill  
7 (Xiaomi WalkingPad C1®; Xiaomi Běijīng, China; 144.9 cm x 52.8 cm x 11.7 cm), while performing  
8 the NEPSY II NL inhibition task (cfr. supra). In order to normalize the walking pattern first, each child  
9 will start with a familiarization period with a maximum duration of five minutes. Then, the participant  
10 will be asked to walk at a self-selected pace without additional task (single-task walking condition).  
11 After 30 seconds, the previously described inhibition task will be introduced (dual-task condition) in an  
12 identical way, with each condition of the inhibition task preceded by a practice item. The test duration  
13 of the cognitive-motor interaction assessment will be 10 minutes. Using the Xiaomi Walkingpad  
14 software and two cameras (D3300, Nikon, Tokyo, Japan – operating at 50 frames/second, and D500,  
15 Canon USA, Inc., Melville, NY, USA – operating at 30 frames/second) (Figure 8) information on a  
16 variety of spatiotemporal parameters will be collected: stride and step length (cm), step width (cm), step  
17 and stride time (s), and walking velocity (cm/s). For the assessment of the cognitive performance during  
18 the dual-task setting, the same response parameters of the single-task modality of the inhibition task (cfr.  
19 supra) will be used during the analysis.

## 20 Secondary outcome measures and potential confounding factors

21 While creating the Balanced Growth protocol, several potential influencing factors and effects were  
22 taken into account. Firstly, given the close anatomical relationship of the vestibular and auditory organs,  
23 the *hearing status* of each participant will be evaluated. Moreover, as hearing impairment is often  
24 present in the target population of the current project, all included cognitive tests are non-auditory and  
25 each test instruction will be given verbally as well as visually. The auditory test battery includes  
26 otoscopy, tympanometry, transient-evoked and distortion product otoacoustic emissions (TE/DPOAEs;  
27 Sentiero desktop, Path Medical, Germany). Secondly, as neuropsychological performances may be  
28 related to *intelligence*, an intelligence screening will be performed prior to the entire cognitive  
29 assessment. For this intelligence screening a short version of the Wechsler Intelligence Scale for  
30 Children (WISC-V-NL) will be used<sup>63</sup>: matrix reasoning, similarities, vocabulary, and block design.  
31 Based on this short version an estimated intelligence score will be reported.

32 As the visual system is also an important sensory system involved in cognitive and motor skills, a *visual*  
33 *screening* will be performed as well. Both static visual acuity (SVA) and dynamic visual acuity (DVA)  
34 will be completed. For both tests, the optotype (the letter 'E') will be randomly presented each trial at  
35 0, 90, 180, or 270° rotation and subjects will be asked to report the direction of the open prongs of the

1  
2  
3 1 'E' (right, left, up, down) at a distance of 3 m. The optotype size will decrease in steps equivalent to a  
4 2 visual acuity change of 0.1 LogMAR. Besides the raw scores on both test conditions, the difference  
5 3 between the SVA and the DVA score will be calculated, in order to assess the contribution of the  
6 4 vestibulo-ocular reflex during head movements. As this is mainly a functional screening, participants  
7 5 who wear glasses or contact lenses will be asked to wear them during the examination.

8 6 In addition, several *practical considerations* were made to avoid the impact of the following potential  
9 7 confounding factors. To prevent fatigue or loss of attention, the assessments were spread over two  
10 8 separate test appointments and the cognitive appointment will only be performed in the morning. During  
11 9 the development of the cognitive tests, a manual response by use of a computer mouse or small buttons  
12 10 was avoided (cfr. supra) in order not to add a (difficult) motor task, which may affect the cognitive  
13 11 performances (in the vestibular-impaired) group. When group differences will be analyzed, all  
14 12 participants will be matched for the following variables: age, gender, handedness, (hearing loss) and  
15 13 randomization order. A learning effect will be minimized as each test will be preceded by practice items.  
16 14 Lastly, to account for other participant-related factors (e.g. physical activity, demographics, and NDD-  
17 15 comorbidities), an extensive anamnestic *questionnaire* (including questions on general information,  
18 16 general medical history, hearing, balance, vision, and motor/cognitive performance), the Flemish  
19 17 Physical Activity Questionnaire<sup>64</sup> (FPAQ), the validated Dutch version<sup>64</sup> of the questionnaire on  
20 18 Disruptive Behaviors in Children (VvGK 6-16 or Vragenlijst voor Gedragsproblemen bij Kinderen<sup>65</sup>),  
21 19 Developmental Coordination Disorder Questionnaire<sup>66</sup> (DCD-Q, Dutch version), and Social  
22 20 Communication Questionnaire – Life time form<sup>67</sup> (SCQ, Dutch version) will be administered as well.

## 23 **Statistical analysis**

24 23 All data will be analyzed using SPSS software (IBM Corp. Released 2017. IBM SPSS Statistics for  
25 24 Windows, V.26.0. Armonk, New York). The level of significance will be set at  $p = 0.05$ . The normality  
26 25 of the data will first be assessed using the Kolmogorov-Smirnov test, QQ plots and histograms.  
27 26 Normally distributed data will be presented as mean (SD) and non-normally distributed data as median  
28 27 (IQR). Cross-sectional results of the audiovestibular group (objective 2) will be studied first using  
29 28 Fisher's exact test for categorical data, the (Paired) Student's t test and the Mann-Whitney U test or the  
30 29 Wilcoxon rank-sum test for normally and non-normally distributed data, respectively. In addition,  
31 30 correlation analyses will be performed. In order to verify the expected outcomes of objectives 1 and 3  
32 31 (within the typically developing and NDD group), both univariate (ANOVAs) and multivariate (linear  
33 32 mixed models, multiple linear and logistic regressions), as well as correlation analyses will be applied.

## PATIENTS AND PUBLIC INVOLVEMENT

The research questions were developed based on problems expressed by vestibular-impaired children and their parents. They were not involved in the outcome measures, the design or implementation of the study. All participants and their parents will receive an individual report on the results of both test appointments. The results of the overall project will be sent to the communication department of Ghent University and Ghent University Hospital for a press release of the research highlights to the general public. Additionally, because of the multidisciplinary nature of the current research, the results of the study will not only be published in specialized journals, but also in more general or multidisciplinary journals, psychological and physiotherapy journals to reach a broader audience.

## ETHICS AND DISSEMINATION

Ethical approval was obtained for this test protocol at the Ghent University Hospital on June 4th 2019 (B670201940165). After written and oral explanation of the project, all participants' parents are asked to give written informed consent in accordance with the Declaration of Helsinki. A register for the processing activities of the study is kept by the investigators. Personal information is pseudonymized, of which only the principal investigator knows the coding system. The information collected in this study is kept strictly confidential, and will be stored for 20 years.

All research findings will be disseminated in peer-reviewed journals and presented at audiovestibular as well as psychological, physiotherapy or multidisciplinary international conferences.

## ACKNOWLEDGEMENT

The authors would like to acknowledge and thank all the children and their parents who participated in the Balanced Growth study until now. Additionally, the authors would like to thank Mark Schittekatte of the Ghent University (Faculty of Psychology and Educational Sciences) and Tyché Perkisas of the Antwerp University for their valuable contribution to the study design.

## AUTHORS' CONTRIBUTION

All authors substantially contributed to the article. Under the supervision and with support of Leen Maes and Frederik Deconinck, Ruth Van Hecke developed the test protocol, drafted the initial manuscript, and improved revised versions. Chloe Clauws, Maya Danneels, Laura Leyssens, Ingeborg Dhooge, Hilde Van Waelvelde, Roeljan Wiersema, Leen Maes and Frederik Deconinck critically reviewed the manuscript, supported during the creation of the Balance Growth protocol and its design, approved the final manuscript as submitted, and are accountable for all aspects of the work.

## FUNDING STATEMENT

This research received no specific grant from any funding agency in the public, commercial or not-for-profit sectors.

1  
2  
3  
4  
5  
6  
7  
8  
9  
10  
11  
12  
13  
14  
15  
16  
17  
18  
19  
20  
21  
22  
23  
24  
25  
26  
27  
28  
29  
30  
31  
32  
33  
34  
35  
36  
37  
38  
39  
40  
41  
42  
43  
44  
45  
46  
47  
48  
49  
50  
51  
52  
53  
54  
55  
56  
57  
58  
59  
60

**COMPETING INTERESTS STATEMENT**

1  
2 The authors declare that the research was conducted in the absence of any commercial or financial  
3 relationships that could be construed as a potential conflict of interest.

For peer review only

## REFERENCES

1. Kingma H, Van de Berg R. Anatomy, physiology, and physics of the peripheral vestibular system. *Handbook of clinical neurology*: Elsevier 2016:1-16.
2. Goldberg JM, Wilson VJ, Angelaki DE, et al. The vestibular system: a sixth sense: Oxford University Press 2012.
3. Dhondt C, Van Hecke R., Dhooge I, et al. Vestibulaire revalidatie: blikstabilisatietraining voor kinderen 2020.
4. Strupp M, Feil K, Dieterich M, et al. Bilateral vestibulopathy. *Handbook of clinical neurology*: Elsevier 2016:235-40.
5. Herdman SJ, Blatt P, Schubert MC, et al. Falls in patients with vestibular deficits. *Otology & Neurotology* 2000;21(6):847-51.
6. Herssens N, Verbecque E, McCrum C, et al. A Systematic Review on Balance Performance in Patients With Bilateral Vestibulopathy. *Physical Therapy* 2020
7. Meldrum D, Jahn K. Gaze stabilisation exercises in vestibular rehabilitation: review of the evidence and recent clinical advances. *Journal of neurology* 2019:1-8.
8. Melo RS, Lemos A, Paiva GS, et al. Vestibular rehabilitation exercises programs to improve the postural control, balance and gait of children with sensorineural hearing loss: A systematic review. *International Journal of Pediatric Otorhinolaryngology* 2019;127:109650.
9. Inoue A, Iwasaki S, Ushio M, et al. Effect of vestibular dysfunction on the development of gross motor function in children with profound hearing loss. *Audiology and Neurotology* 2013;18(3):143-51.
10. Kaga K, Shinjo Y, Jin Y, et al. Vestibular failure in children with congenital deafness. *International journal of audiology* 2008;47(9):590-99.
11. Rapin I. Hypoactive labyrinths and motor development. *Clinical Pediatrics* 1974;13(11):922-37.
12. Horak FB, Shumway-Cook A, Crowe TK, et al. Vestibular function and motor proficiency of children with impaired hearing, or with learning disability and motor impairments. *Developmental Medicine & Child Neurology* 1988;30(1):64-79.
13. Crowe TK, Horak FB. Motor proficiency associated with vestibular deficits in children with hearing impairments. *Physical therapy* 1988;68(10):1493-99.
14. Rine RM, Cornwall G, Gan K, et al. Evidence of progressive delay of motor development in children with sensorineural hearing loss and concurrent vestibular dysfunction. *Perceptual and motor skills* 2000;90(3\_suppl):1101-12.
15. Shall MS. The importance of saccular function to motor development in children with hearing impairments. *International journal of otolaryngology* 2009;2009
16. Jafari Z, Malayeri SA. The effect of saccular function on static balance ability of profound hearing-impaired children. *International journal of pediatric otorhinolaryngology* 2011;75(7):919-24.
17. Maes L, De Kegel A, Van Waelvelde H, et al. Comparison of the motor performance and vestibular function in infants with a congenital cytomegalovirus infection or a connexin 26 mutation: a preliminary study. *Ear and hearing* 2017;38(1):e49-e56.
18. Ionescu E, Reynard P, Goulème N, et al. How sacculo-colic function assessed by cervical vestibular evoked myogenic Potentials correlates with the quality of postural control in hearing impaired children? *International Journal of Pediatric Otorhinolaryngology* 2020;130:109840.
19. Janky K, Givens D. Vestibular, visual acuity and balance outcomes in children with cochlear implants: a preliminary report. *Ear and hearing* 2015;36(6):e364.
20. Maes L, De Kegel A, Van Waelvelde H, et al. Association between vestibular function and motor performance in hearing-impaired children. *Otology & Neurotology* 2014;35(10):e343-e47.
21. Oyewumi M, Wolter NE, Heon E, et al. Using balance function to screen for vestibular impairment in children with sensorineural hearing loss and cochlear implants. *Otology & Neurotology* 2016;37(7):926-32.
22. De Kegel A, Maes L, Van Waelvelde H, et al. Examining the impact of cochlear implantation on the early gross motor development of children with a hearing loss. *Ear and Hearing* 2015;36(3):e113-e21.



- 1 23. Cushing SL, Papsin BC, Rutka JA, et al. Vestibular end-organ and balance deficits after meningitis  
2 and cochlear implantation in children correlate poorly with functional outcome. *Otology &*  
3 *Neurotology* 2009;30(4):488-95.
- 4 24. Sokolov M, Gordon KA, Polonenko M, et al. Vestibular and balance function is often impaired in  
5 children with profound unilateral sensorineural hearing loss. *Hearing research* 2019;372:52-61.
- 6 25. Hall CD, Herdman SJ, Whitney SL, et al. Vestibular rehabilitation for peripheral vestibular  
7 hypofunction: an evidence-based clinical practice guideline: from the American physical  
8 therapy association neurology section. *Journal of Neurologic Physical Therapy* 2016;40(2):124.
- 9 26. Rine RM, Braswell J, Fisher D, et al. Improvement of motor development and postural control  
10 following intervention in children with sensorineural hearing loss and vestibular impairment.  
11 *International journal of pediatric otorhinolaryngology* 2004;68(9):1141-48.
- 12 27. Bigelow RT, Agrawal Y. Vestibular involvement in cognition: Visuospatial ability, attention,  
13 executive function, and memory. *Journal of Vestibular Research* 2015;25(2):73-89.
- 14 28. Smith PF. The vestibular system and cognition. *Current opinion in neurology* 2017;30(1):84-89.
- 15 29. Hitier M, Besnard S, Smith PF. Vestibular pathways involved in cognition. *Frontiers in integrative*  
16 *neuroscience* 2014;8:59.
- 17 30. Besnard S, Lopez C, Brandt T, et al. The vestibular system in cognitive and memory processes in  
18 mammals. *Frontiers in Integrative Neuroscience* 2015;9:55.
- 19 31. Van Hecke R, Danneels M, Dhooge I, et al. Vestibular function in children with neurodevelopmental  
20 disorders: a systematic review. *Journal of autism and developmental disorders*  
21 2019;49(8):3328-50.
- 22 32. Lacroix E, Edwards MG, De Volder A, et al. Neuropsychological profiles of children with vestibular  
23 loss. *Journal of Vestibular Research* 2020(Preprint):1-9.
- 24 33. Wiener-Vacher SR, Hamilton DA, Wiener SI. Vestibular activity and cognitive development in  
25 children: perspectives. *Frontiers in integrative neuroscience* 2013;7:92.
- 26 34. Braswell J, Rine RM. Evidence that vestibular hypofunction affects reading acuity in children.  
27 *International journal of pediatric otorhinolaryngology* 2006;70(11):1957-65.
- 28 35. Lucieer F, Van Hecke R, van Stiphout L, et al. Bilateral vestibulopathy: beyond imbalance and  
29 oscillopsia. *Journal of Neurology* 2020:1-15.
- 30 36. Deroualle D, Lopez C. Toward a vestibular contribution to social cognition. *Frontiers in Integrative*  
31 *Neuroscience* 2014;8:16.
- 32 37. Gurvich C, Maller JJ, Lithgow B, et al. Vestibular insights into cognition and psychiatry. *brain*  
33 *research* 2013;1537:244-59.
- 34 38. Le Gall A, Hilber P, Chesneau C, et al. The critical role of vestibular graviception during cognitive-  
35 motor development. *Behavioural Brain Research* 2019;372:112040.
- 36 39. Popp P, Wulff M, Finke K, et al. Cognitive deficits in patients with a chronic vestibular failure.  
37 *Journal of neurology* 2017;264(3):554-63.
- 38 40. Ferrè ER, Haggard P. Vestibular cognition: State-of-the-art and future directions. *Cognitive*  
39 *Neuropsychology* 2020:1-8.
- 40 41. Danneels M, Van Hecke R, Leyssens L, et al. 2BALANCE: a cognitive-motor dual-task protocol  
41 for individuals with vestibular dysfunction. *BMJ open* 2020;10(7):e037138.
- 42 42. Danneels M, Van Hecke R, Keppler H, et al. Psychometric properties of cognitive-motor dual-task  
43 studies with the aim of developing a test protocol for persons with vestibular disorders: a  
44 systematic review. *Ear and hearing* 2020;41(1):3-16.
- 45 43. Stins JF, Emck C. Balance performance in autism: A brief overview. *Frontiers in psychology*  
46 2018;9:901.
- 47 44. Inder JM, Sullivan SJ. Motor and postural response profiles of four children with developmental  
48 coordination disorder. *Pediatric Physical Therapy* 2005;17(1):18-29.
- 49 45. Deconinck FJ, De Clercq D, Van Coster R, et al. Sensory contributions to balance in boys with  
50 developmental coordination disorder. *Adapted Physical Activity Quarterly* 2008;25(1):17-35.
- 51 46. Buderath P, Gärtner K, Frings M, et al. Postural and gait performance in children with attention  
52 deficit/hyperactivity disorder. *Gait & posture* 2009;29(2):249-54.
- 53 47. Association AP. Diagnostic and statistical manual of mental disorders (DSM-5®): American  
54 Psychiatric Pub 2013.

- 1  
2  
3 1 48. Lotfi Y, Rezazadeh N, Moossavi A, et al. Rotational and collic vestibular-evoked myogenic potential  
4 2 testing in normal developing children and children with combined attention deficit/hyperactivity  
5 3 disorder. *Ear and hearing* 2017;38(6):e352-e58.
- 6 4 49. MacDougall HG, McGarvie LA, Halmagyi GM, et al. A new saccadic indicator of peripheral  
7 5 vestibular function based on the video head impulse test. *Neurology* 2016;87(4):410-18.
- 8 6 50. Leysens L, Van Hecke R, Moons K, et al. Vestibular function in adults with intellectual disabilities:  
9 7 feasibility and outcome of a vestibular screening protocol in Special Olympics athletes.  
10 8 *International Journal of Audiology* 2020:1-12.
- 11 9 51. Vanspauwen R, Wuyts FL, Krijger S, et al. Comparison of different electrode configurations for the  
12 10 oVEMP with bone-conducted vibration. *Ear and hearing* 2017;38(2):205-11.
- 13 11 52. Dhondt C, Dhooge I, Maes L. Vestibular assessment in the pediatric population. *Laryngoscope*  
14 12 2019;129(2):490-93.
- 15 13 53. Maes L, Dhooge I, De Vel E, et al. Normative data and test-retest reliability of the sinusoidal  
16 14 harmonic acceleration test, pseudorandom rotation test and velocity step test. *Journal of*  
17 15 *Vestibular Research* 2008;18(4):197-208.
- 18 16 54. Henderson S, Sugden D, Barnett A. Movement Assessment Battery for Children-2 (Dutch Manual):  
19 17 Pearson Assessment, London, UK, 2007.
- 20 18 55. Kiphard EJ, Schilling F. Körperkoordinationstest für kinder: KTK: Beltz-Test 2007.
- 21 19 56. Cohen H, Blatchly CA, Gombash LL. A study of the clinical test of sensory interaction and balance.  
22 20 *Physical therapy* 1993;73(6):346-51.
- 23 21 57. Cooper J, Siegfried K, Ahmed A. BrainBLoX: Brain and Biomechanics Lab in a Box Software:  
24 22 Version, 2014.
- 25 23 58. Mueller ST, Piper BJ. The psychology experiment building language (PEBL) and PEBL test battery.  
26 24 *Journal of neuroscience methods* 2014;222:250-59.
- 27 25 59. Korkman M, Kirk U, Kemp S. NEPSY II: Clinical and interpretive manual: Harcourt Assessment,  
28 26 PsychCorp 2007.
- 29 27 60. Zijlstra H, Kingma A, Swaab H, et al. Nepsy-II-nl. *Enschede: Ipskamp* 2010
- 30 28 61. Stanislaw H, Todorov N. Calculation of signal detection theory measures. *Behavior research*  
31 29 *methods, instruments, & computers* 1999;31(1):137-49.
- 32 30 62. Beery KE, Buktenica NA, Beery NA. The Beery-Buktenica developmental test of visual-motor  
33 31 integration: Administration, scoring, and teaching manual (6th ed.): Minneapolis: NCS Pearson,  
34 32 Inc. 2010.
- 35 33 63. Aubry A, Bourdin B. Short Forms of Wechsler scales assessing the intellectually gifted children  
36 34 using simulation data. *Frontiers in psychology* 2018;9:830.
- 37 35 64. Philippaerts R, Matton L, Wijndaele K, et al. Validity of a physical activity computer questionnaire  
38 36 in 12-to 18-year-old boys and girls. *International journal of sports medicine* 2006;27(02):131-  
39 37 36.
- 40 38 65. Oosterlaan J, Baeyens D, Scheres A, et al. VvGK 6–16 vragenlijst voor gedragsproblemen bij  
41 39 kinderen 6–16 jaar. handleiding: Amsterdam: Pearson Assessment and Information BV, 2008.
- 42 40 66. Wilson BN, Kaplan BJ, Crawford SG, et al. Reliability and validity of a parent questionnaire on  
43 41 childhood motor skills. *American Journal of Occupational Therapy* 2000;54(5):484-93.
- 44 42 67. Rutter M, Bailey A, Lord C. The social communication questionnaire: Manual: Western  
45 43 Psychological Services 2003.
- 46  
47  
48  
49 44  
50  
51 45  
52  
53  
54  
55  
56  
57  
58  
59  
60



**FIGURES**

- 1  
2  
3 1  
4  
5 2  
6 3 *Figure 1. The vestibular system and its most important input and output structures. After permission of the authors*  
7 *the figure was adapted and translated from Dhondt et al. (2020)<sup>3</sup>.*  
8  
9  
10 5 *Figure 2. The Balanced Growth protocol including vestibular, cognitive, motor, and cognitive-motor interaction*  
11 *assessments, and also several additional screenings to control for potential confounding factors.*  
12  
13 7 *Figure 3. Vestibular test battery of the Balanced Growth protocol. c/oVEMP = a cervical (air-conduction) and*  
14 *ocular (using a minishaker) Vestibular Evoked Myogenic Potential assessment; vHIT = video Head Impulse Test*  
15 *in all planes of the semicircular canals (lateral, anterior, posterior).*  
16 9  
17  
18 10 *Figure 4. Motor and balance test battery of the Balanced Growth protocol, which includes the motor assessment*  
19 *battery for children (M ABC, 2<sup>nd</sup> edition), the first subtest of the Körperkoordination Test für Kinder (KTK,*  
20 *backward balance beam walking), and the modified Clinical Test of Sensory Interaction on Balance (m-CTSIB)*  
21 *performed on a Wii Balance Board.*  
22  
23  
24 14 *Figure 5. The extensive cognitive test battery of the Balanced Growth protocol based on the six neurocognitive*  
25 *domains of the DSM-5; NEPSY II NL = Developmental Neuropsychological Assessment, Second Edition, Dutch*  
26 *version, BRIEF = the parent-report questionnaire Behaviour Rating Inventory of Executive Function.*  
27  
28 16  
29  
30 17 *Figure 6. Test set up, including a touch screen monitor, for the spatial span task (forward/backward).*  
31  
32 18 *Figure 7. Test set up for the digit span (forward/backward) and continuous performance task.*  
33  
34 19 *Figure 8. Test set up for the cognitive-motor interference assessment of the Balanced Growth project.*  
35  
36 20  
37  
38  
39  
40  
41  
42  
43  
44  
45  
46  
47  
48  
49  
50  
51  
52  
53  
54  
55  
56  
57  
58  
59  
60

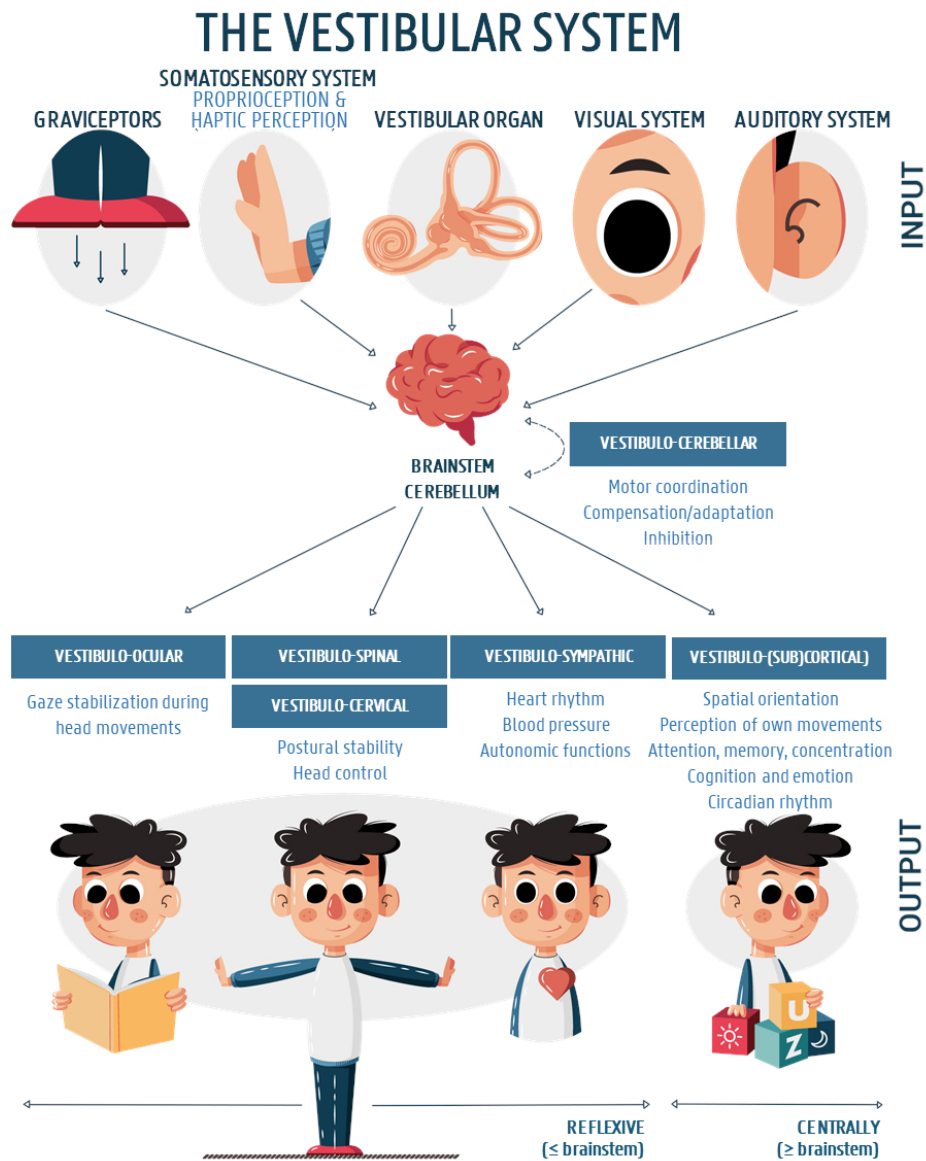

Figure 1. The vestibular system and its most important input and output structures. After permission of the authors the figure was adapted and translated from Dhondt et al. (2020).

76x98mm (300 x 300 DPI)

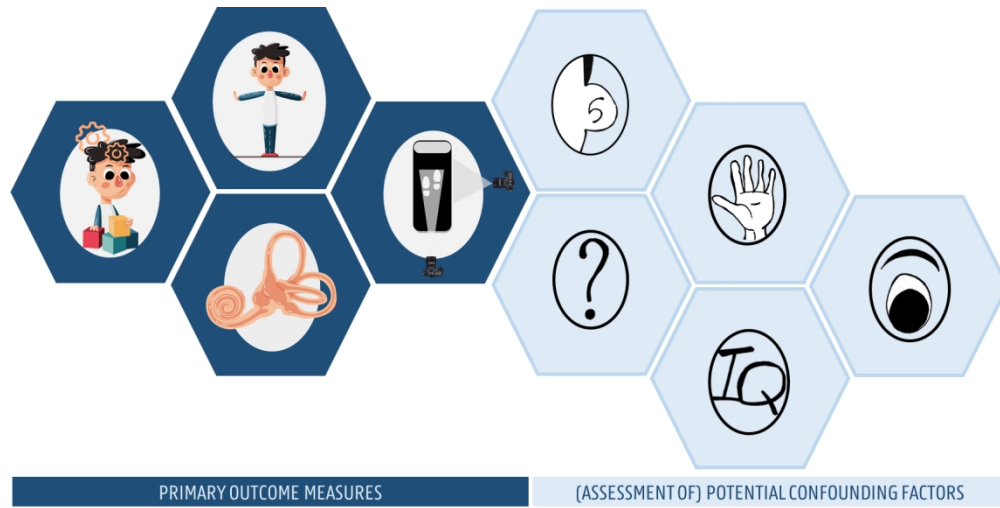

Figure 2. The Balanced Growth protocol including vestibular, cognitive, motor, and cognitive-motor interaction assessments, and also several additional screenings to control for potential confounding factors.

145x74mm (300 x 300 DPI)

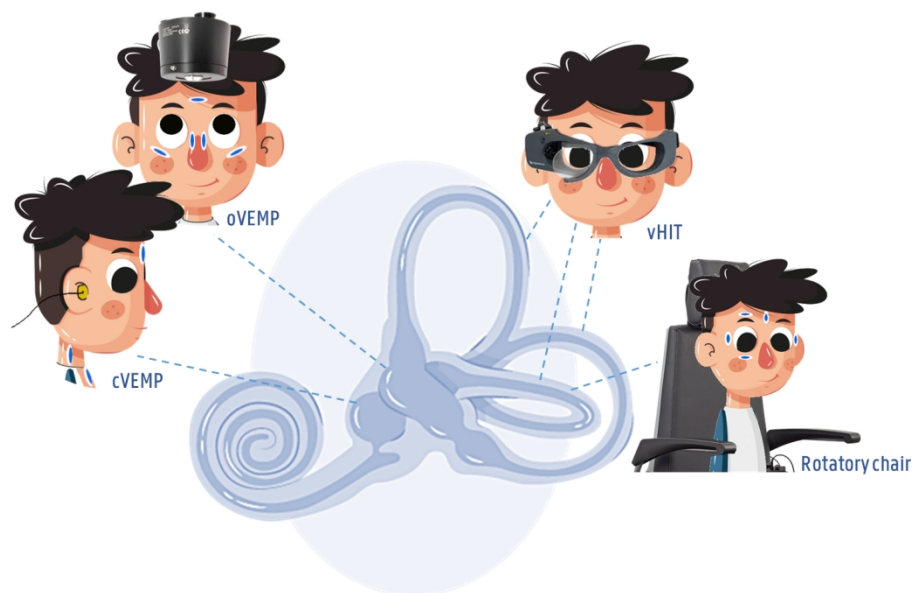

Figure 3. Vestibular test battery of the Balanced Growth protocol. c/oVEMP = a cervical (air-conduction) and ocular (using a minishaker) Vestibular Evoked Myogenic Potential assessment; vHIT = video Head Impulse Test in all planes of the semicircular canals (lateral, anterior, posterior).

139x85mm (300 x 300 DPI)

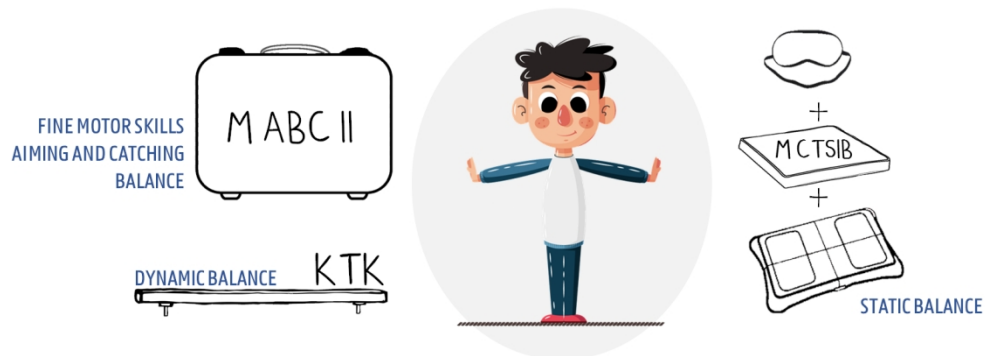

Figure 4. Motor and balance test battery of the Balanced Growth protocol, which includes the motor assessment battery for children (M ABC, 2nd edition), the first subtest of the Körperkoordination Test für Kinder (KTK, backward balance beam walking), and the modified Clinical Test of Sensory Interaction on Balance (m-CTSIB) performed on a Wii Balance Board.

139x58mm (300 x 300 DPI)

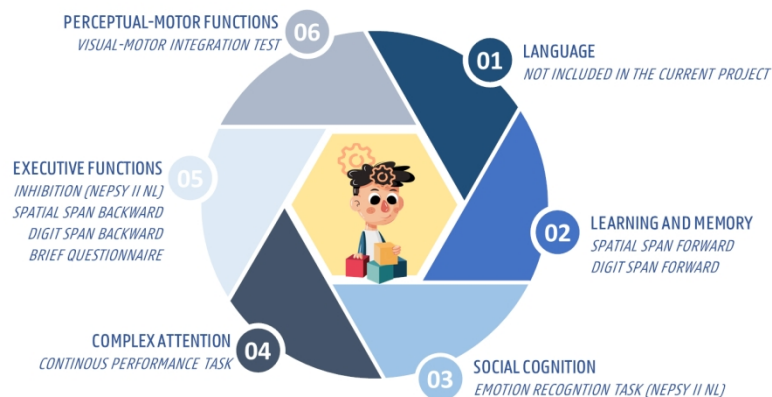

Figure 5. The extensive cognitive test battery of the Balanced Growth protocol based on the six neurocognitive domains of the DSM-5; NEPSY II NL = Developmental Neuropsychological Assessment, Second Edition, Dutch version, BRIEF = the parent-report questionnaire Behaviour Rating Inventory of Executive Function.

158x64mm (300 x 300 DPI)

1  
2  
3  
4  
5  
6  
7  
8  
9  
10  
11  
12  
13  
14  
15  
16  
17  
18  
19  
20  
21  
22  
23  
24  
25  
26  
27  
28  
29  
30  
31  
32  
33  
34  
35  
36  
37  
38  
39  
40  
41  
42  
43  
44  
45  
46  
47  
48  
49  
50  
51  
52  
53  
54  
55  
56  
57  
58  
59  
60

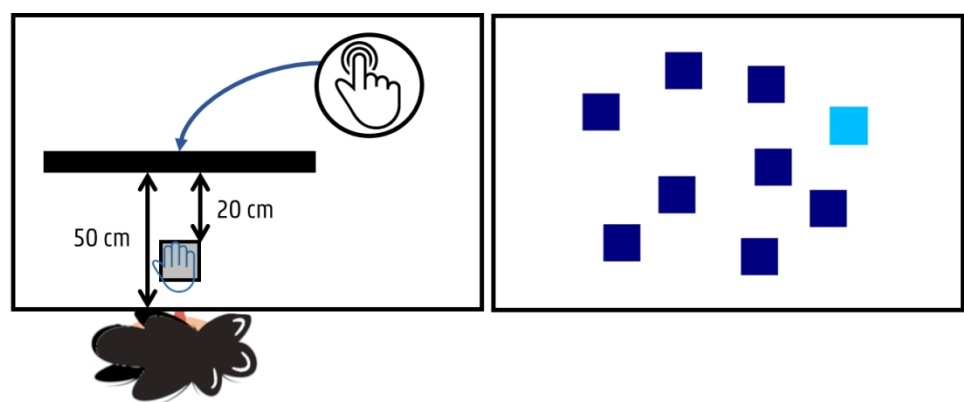

Figure 6. Test set up, including a touch screen monitor, for the spatial span task (forward/backward).

117x51mm (300 x 300 DPI)

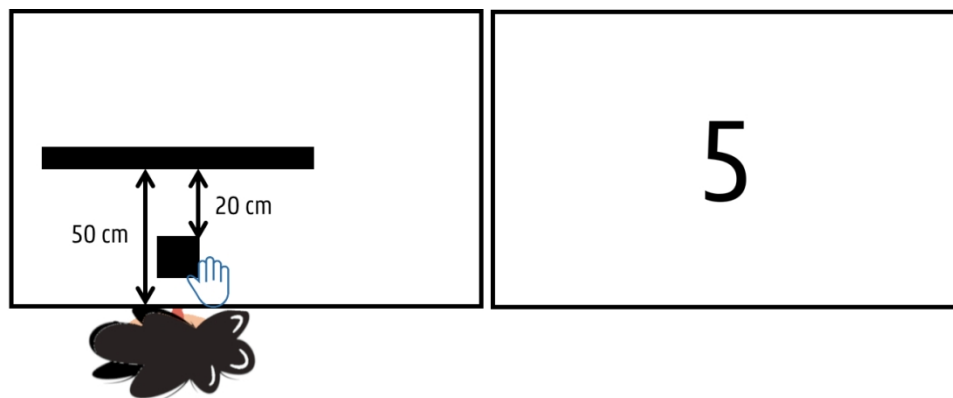

Figure 7. Test set up for the digit span (forward/backward) and continuous performance task.

116x48mm (300 x 300 DPI)



1  
2  
3  
4  
5  
6  
7  
8  
9  
10  
11  
12  
13  
14  
15  
16  
17  
18  
19  
20  
21  
22  
23  
24  
25  
26  
27  
28  
29  
30  
31  
32  
33  
34  
35  
36  
37  
38  
39  
40  
41  
42  
43  
44  
45  
46  
47  
48  
49  
50  
51  
52  
53  
54  
55  
56  
57  
58  
59  
60

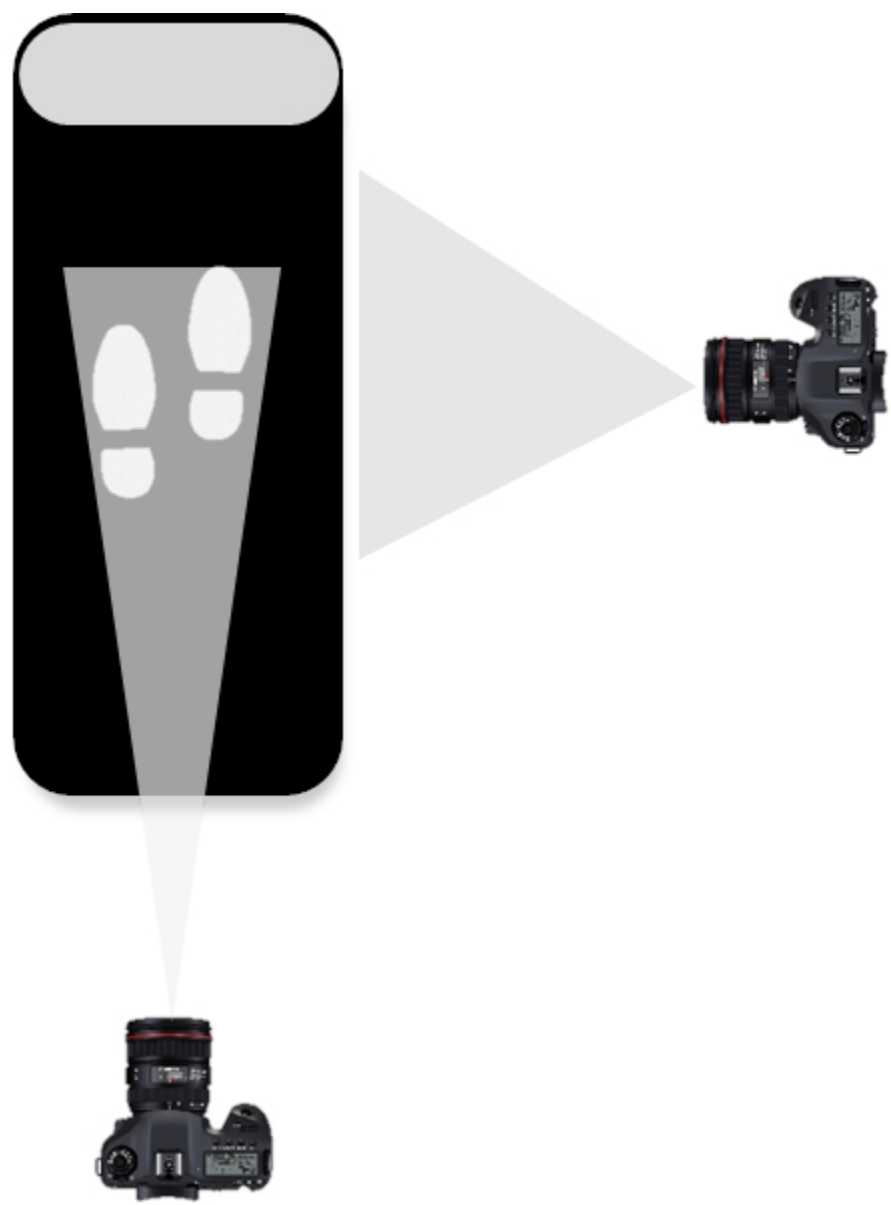

Figure 8. Test set up for the cognitive-motor interference assessment of the Balanced Growth project.

37x50mm (300 x 300 DPI)

## Reporting checklist for protocol of a clinical trial.

Based on the SPIRIT guidelines.

### Instructions to authors

Complete this checklist by entering the page numbers from your manuscript where readers will find each of the items listed below.

Your article may not currently address all the items on the checklist. Please modify your text to include the missing information. If you are certain that an item does not apply, please write "n/a" and provide a short explanation.

Upload your completed checklist as an extra file when you submit to a journal.

In your methods section, say that you used the SPIRIT reporting guidelines, and cite them as:

Chan A-W, Tetzlaff JM, Gøtzsche PC, Altman DG, Mann H, Berlin J, Dickersin K, Hróbjartsson A, Schulz KF, Parulekar WR, Krleža-Jerić K, Laupacis A, Moher D. SPIRIT 2013 Explanation and Elaboration: Guidance for protocols of clinical trials. *BMJ*. 2013;346:e7586

|                                   | Reporting Item                                                                                                                  | Page Number |
|-----------------------------------|---------------------------------------------------------------------------------------------------------------------------------|-------------|
| <b>Administrative information</b> |                                                                                                                                 |             |
| Title                             | <a href="#">#1</a> Descriptive title identifying the study design, population, interventions, and, if applicable, trial acronym | 1           |
| Trial registration                | <a href="#">#2a</a> Trial identifier and registry name. If not yet registered, name of intended registry                        | 1           |

|    |                     |                     |                                                    |          |
|----|---------------------|---------------------|----------------------------------------------------|----------|
| 1  | Trial registration: | <a href="#">#2b</a> | All items from the World Health Organization       | N/A      |
| 2  |                     |                     |                                                    |          |
| 3  | data set            |                     | Trial Registration Data Set                        |          |
| 4  |                     |                     |                                                    |          |
| 5  |                     |                     |                                                    |          |
| 6  | Protocol version    | <a href="#">#3</a>  | Date and version identifier                        | N/A      |
| 7  |                     |                     |                                                    |          |
| 8  |                     |                     |                                                    |          |
| 9  | Funding             | <a href="#">#4</a>  | Sources and types of financial, material, and      | 17       |
| 10 |                     |                     | other support                                      |          |
| 11 |                     |                     |                                                    |          |
| 12 |                     |                     |                                                    |          |
| 13 |                     |                     |                                                    |          |
| 14 |                     |                     |                                                    |          |
| 15 | Roles and           | <a href="#">#5a</a> | Names, affiliations, and roles of protocol         | 1 and 17 |
| 16 | responsibilities:   |                     | contributors                                       |          |
| 17 |                     |                     |                                                    |          |
| 18 | contributorship     |                     |                                                    |          |
| 19 |                     |                     |                                                    |          |
| 20 |                     |                     |                                                    |          |
| 21 |                     |                     |                                                    |          |
| 22 |                     |                     |                                                    |          |
| 23 | Roles and           | <a href="#">#5b</a> | Name and contact information for the trial         | N/A      |
| 24 | responsibilities:   |                     | sponsor                                            |          |
| 25 |                     |                     |                                                    |          |
| 26 | sponsor contact     |                     |                                                    |          |
| 27 |                     |                     |                                                    |          |
| 28 | information         |                     |                                                    |          |
| 29 |                     |                     |                                                    |          |
| 30 |                     |                     |                                                    |          |
| 31 |                     |                     |                                                    |          |
| 32 | Roles and           | <a href="#">#5c</a> | Role of study sponsor and funders, if any, in      | N/A      |
| 33 | responsibilities:   |                     | study design; collection, management, analysis,    |          |
| 34 |                     |                     | and interpretation of data; writing of the report; |          |
| 35 | sponsor and funder  |                     | and the decision to submit the report for          |          |
| 36 |                     |                     | publication, including whether they will have      |          |
| 37 |                     |                     | ultimate authority over any of these activities    |          |
| 38 |                     |                     |                                                    |          |
| 39 |                     |                     |                                                    |          |
| 40 |                     |                     |                                                    |          |
| 41 |                     |                     |                                                    |          |
| 42 |                     |                     |                                                    |          |
| 43 |                     |                     |                                                    |          |
| 44 |                     |                     |                                                    |          |
| 45 |                     |                     |                                                    |          |
| 46 |                     |                     |                                                    |          |
| 47 | Roles and           | <a href="#">#5d</a> | Composition, roles, and responsibilities of the    | N/A      |
| 48 | responsibilities:   |                     | coordinating centre, steering committee,           |          |
| 49 |                     |                     | endpoint adjudication committee, data              |          |
| 50 | committees          |                     | management team, and other individuals or          |          |
| 51 |                     |                     |                                                    |          |
| 52 |                     |                     |                                                    |          |
| 53 |                     |                     |                                                    |          |
| 54 |                     |                     |                                                    |          |
| 55 |                     |                     |                                                    |          |
| 56 |                     |                     |                                                    |          |
| 57 |                     |                     |                                                    |          |
| 58 |                     |                     |                                                    |          |
| 59 |                     |                     |                                                    |          |
| 60 |                     |                     |                                                    |          |

groups overseeing the trial, if applicable (see  
Item 21a for data monitoring committee)

## Introduction

|                                                  |                     |                                                                                                                                                                                                            |     |
|--------------------------------------------------|---------------------|------------------------------------------------------------------------------------------------------------------------------------------------------------------------------------------------------------|-----|
| Background and rationale                         | <a href="#">#6a</a> | Description of research question and justification for undertaking the trial, including summary of relevant studies (published and unpublished) examining benefits and harms for each intervention         | 4-5 |
| Background and rationale: choice of comparators  | <a href="#">#6b</a> | Explanation for choice of comparators                                                                                                                                                                      | 5   |
| Objectives                                       | <a href="#">#7</a>  | Specific objectives or hypotheses                                                                                                                                                                          | 5-6 |
| Trial design                                     | <a href="#">#8</a>  | Description of trial design including type of trial (eg, parallel group, crossover, factorial, single group), allocation ratio, and framework (eg, superiority, equivalence, non-inferiority, exploratory) | 7-8 |
| <b>Methods:</b>                                  |                     |                                                                                                                                                                                                            |     |
| <b>Participants, interventions, and outcomes</b> |                     |                                                                                                                                                                                                            |     |
| Study setting                                    | <a href="#">#9</a>  | Description of study settings (eg, community clinic, academic hospital) and list of countries                                                                                                              | 7-8 |

|    |                      |                                                                        |      |
|----|----------------------|------------------------------------------------------------------------|------|
| 1  |                      | where data will be collected. Reference to                             |      |
| 2  |                      |                                                                        |      |
| 3  |                      | where list of study sites can be obtained                              |      |
| 4  |                      |                                                                        |      |
| 5  |                      |                                                                        |      |
| 6  | Eligibility criteria | <a href="#">#10</a> Inclusion and exclusion criteria for participants. | 7-8  |
| 7  |                      |                                                                        |      |
| 8  |                      | If applicable, eligibility criteria for study centres                  |      |
| 9  |                      |                                                                        |      |
| 10 |                      | and individuals who will perform the                                   |      |
| 11 |                      |                                                                        |      |
| 12 |                      | interventions (eg, surgeons, psychotherapists)                         |      |
| 13 |                      |                                                                        |      |
| 14 |                      |                                                                        |      |
| 15 |                      |                                                                        |      |
| 16 | Interventions:       | <a href="#">#11a</a> Interventions for each group with sufficient      | N/A  |
| 17 |                      |                                                                        |      |
| 18 | description          | detail to allow replication, including how and                         |      |
| 19 |                      |                                                                        |      |
| 20 |                      | when they will be administered                                         |      |
| 21 |                      |                                                                        |      |
| 22 |                      |                                                                        |      |
| 23 | Interventions:       | <a href="#">#11b</a> Criteria for discontinuing or modifying allocated | N/A  |
| 24 |                      |                                                                        |      |
| 25 | modifications        | interventions for a given trial participant (eg,                       |      |
| 26 |                      |                                                                        |      |
| 27 |                      | drug dose change in response to harms,                                 |      |
| 28 |                      | participant request, or improving / worsening                          |      |
| 29 |                      |                                                                        |      |
| 30 |                      | disease)                                                               |      |
| 31 |                      |                                                                        |      |
| 32 |                      |                                                                        |      |
| 33 |                      |                                                                        |      |
| 34 |                      |                                                                        |      |
| 35 | Interventions:       | <a href="#">#11c</a> Strategies to improve adherence to intervention   | N/A  |
| 36 |                      |                                                                        |      |
| 37 | adherence            | protocols, and any procedures for monitoring                           |      |
| 38 |                      |                                                                        |      |
| 39 |                      | adherence (eg, drug tablet return; laboratory                          |      |
| 40 |                      |                                                                        |      |
| 41 |                      | tests)                                                                 |      |
| 42 |                      |                                                                        |      |
| 43 |                      |                                                                        |      |
| 44 |                      |                                                                        |      |
| 45 | Interventions:       | <a href="#">#11d</a> Relevant concomitant care and interventions       | N/A  |
| 46 |                      |                                                                        |      |
| 47 | concomitant care     | that are permitted or prohibited during the trial                      |      |
| 48 |                      |                                                                        |      |
| 49 |                      |                                                                        |      |
| 50 |                      |                                                                        |      |
| 51 | Outcomes             | <a href="#">#12</a> Primary, secondary, and other outcomes,            | 9-16 |
| 52 |                      |                                                                        |      |
| 53 |                      | including the specific measurement variable                            |      |
| 54 |                      |                                                                        |      |
| 55 |                      | (eg, systolic blood pressure), analysis metric                         |      |
| 56 |                      |                                                                        |      |
| 57 |                      | (eg, change from baseline, final value, time to                        |      |
| 58 |                      |                                                                        |      |
| 59 |                      |                                                                        |      |
| 60 |                      |                                                                        |      |

event), method of aggregation (eg, median, proportion), and time point for each outcome. Explanation of the clinical relevance of chosen efficacy and harm outcomes is strongly recommended

|                                                                                                                                                                                                                                           |                      |                     |                                                                                                                                                                                       |          |
|-------------------------------------------------------------------------------------------------------------------------------------------------------------------------------------------------------------------------------------------|----------------------|---------------------|---------------------------------------------------------------------------------------------------------------------------------------------------------------------------------------|----------|
| 1<br>2<br>3<br>4<br>5<br>6<br>7<br>8<br>9<br>10<br>11<br>12<br>13<br>14<br>15<br>16<br>17<br>18<br>19<br>20<br>21<br>22<br>23<br>24<br>25<br>26<br>27<br>28<br>29<br>30<br>31<br>32<br>33<br>34<br>35<br>36<br>37<br>38<br>39<br>40<br>41 | Participant timeline | <a href="#">#13</a> | Time schedule of enrolment, interventions (including any run-ins and washouts), assessments, and visits for participants. A schematic diagram is highly recommended (see Figure)      | 9 and 16 |
| 42<br>43<br>44<br>45<br>46<br>47<br>48<br>49<br>50                                                                                                                                                                                        | Sample size          | <a href="#">#14</a> | Estimated number of participants needed to achieve study objectives and how it was determined, including clinical and statistical assumptions supporting any sample size calculations | 8-9      |
| 51<br>52<br>53<br>54<br>55<br>56<br>57<br>58<br>59<br>60                                                                                                                                                                                  | Recruitment          | <a href="#">#15</a> | Strategies for achieving adequate participant enrolment to reach target sample size                                                                                                   | 7-8      |

## Methods:

### Assignment of interventions (for controlled trials)

|                                                    |                                       |                      |                                                                                                                                      |     |
|----------------------------------------------------|---------------------------------------|----------------------|--------------------------------------------------------------------------------------------------------------------------------------|-----|
| 52<br>53<br>54<br>55<br>56<br>57<br>58<br>59<br>60 | Allocation:<br>sequence<br>generation | <a href="#">#16a</a> | Method of generating the allocation sequence (eg, computer-generated random numbers), and list of any factors for stratification. To | N/A |
|----------------------------------------------------|---------------------------------------|----------------------|--------------------------------------------------------------------------------------------------------------------------------------|-----|

1 reduce predictability of a random sequence,  
 2  
 3 details of any planned restriction (eg, blocking)  
 4  
 5 should be provided in a separate document that  
 6  
 7 is unavailable to those who enrol participants or  
 8  
 9 assign interventions  
 10

|    |                      |                      |                                                  |
|----|----------------------|----------------------|--------------------------------------------------|
| 11 |                      |                      |                                                  |
| 12 | Allocation           | <a href="#">#16b</a> | Mechanism of implementing the allocation         |
| 13 |                      |                      |                                                  |
| 14 | concealment          |                      | sequence (eg, central telephone; sequentially    |
| 15 |                      |                      |                                                  |
| 16 | mechanism            |                      | numbered, opaque, sealed envelopes),             |
| 17 |                      |                      |                                                  |
| 18 |                      |                      | describing any steps to conceal the sequence     |
| 19 |                      |                      |                                                  |
| 20 |                      |                      | until interventions are assigned                 |
| 21 |                      |                      |                                                  |
| 22 |                      |                      |                                                  |
| 23 |                      |                      |                                                  |
| 24 | Allocation:          | <a href="#">#16c</a> | Who will generate the allocation sequence, who   |
| 25 |                      |                      |                                                  |
| 26 | implementation       |                      | will enrol participants, and who will assign     |
| 27 |                      |                      |                                                  |
| 28 |                      |                      | participants to interventions                    |
| 29 |                      |                      |                                                  |
| 30 |                      |                      |                                                  |
| 31 |                      |                      |                                                  |
| 32 | Blinding (masking)   | <a href="#">#17a</a> | Who will be blinded after assignment to          |
| 33 |                      |                      |                                                  |
| 34 |                      |                      | interventions (eg, trial participants, care      |
| 35 |                      |                      |                                                  |
| 36 |                      |                      | providers, outcome assessors, data analysts),    |
| 37 |                      |                      |                                                  |
| 38 |                      |                      | and how                                          |
| 39 |                      |                      |                                                  |
| 40 |                      |                      |                                                  |
| 41 |                      |                      |                                                  |
| 42 | Blinding (masking):  | <a href="#">#17b</a> | If blinded, circumstances under which            |
| 43 |                      |                      |                                                  |
| 44 | emergency            |                      | unblinding is permissible, and procedure for     |
| 45 |                      |                      |                                                  |
| 46 | unblinding           |                      | revealing a participant's allocated intervention |
| 47 |                      |                      |                                                  |
| 48 |                      |                      | during the trial                                 |
| 49 |                      |                      |                                                  |
| 50 |                      |                      |                                                  |
| 51 |                      |                      |                                                  |
| 52 | <b>Methods: Data</b> |                      |                                                  |
| 53 |                      |                      |                                                  |
| 54 | <b>collection,</b>   |                      |                                                  |
| 55 |                      |                      |                                                  |
| 56 |                      |                      |                                                  |
| 57 |                      |                      |                                                  |
| 58 |                      |                      |                                                  |
| 59 |                      |                      |                                                  |
| 60 |                      |                      |                                                  |

1 **management, and**  
 2  
 3 **analysis**  
 4

|    |                      |                      |                                                      |
|----|----------------------|----------------------|------------------------------------------------------|
| 5  |                      |                      |                                                      |
| 6  | Data collection plan | <a href="#">#18a</a> | Plans for assessment and collection of               |
| 7  |                      |                      |                                                      |
| 8  |                      |                      | outcome, baseline, and other trial data,             |
| 9  |                      |                      |                                                      |
| 10 |                      |                      | including any related processes to promote           |
| 11 |                      |                      |                                                      |
| 12 |                      |                      | data quality (eg, duplicate measurements,            |
| 13 |                      |                      |                                                      |
| 14 |                      |                      | training of assessors) and a description of study    |
| 15 |                      |                      |                                                      |
| 16 |                      |                      | instruments (eg, questionnaires, laboratory          |
| 17 |                      |                      |                                                      |
| 18 |                      |                      | tests) along with their reliability and validity, if |
| 19 |                      |                      |                                                      |
| 20 |                      |                      | known. Reference to where data collection            |
| 21 |                      |                      |                                                      |
| 22 |                      |                      | forms can be found, if not in the protocol           |
| 23 |                      |                      |                                                      |
| 24 |                      |                      |                                                      |
| 25 |                      |                      |                                                      |
| 26 |                      |                      |                                                      |
| 27 | Data collection      | <a href="#">#18b</a> | Plans to promote participant retention and           |
| 28 |                      |                      |                                                      |
| 29 | plan: retention      |                      | complete follow-up, including list of any            |
| 30 |                      |                      |                                                      |
| 31 |                      |                      | outcome data to be collected for participants        |
| 32 |                      |                      |                                                      |
| 33 |                      |                      | who discontinue or deviate from intervention         |
| 34 |                      |                      |                                                      |
| 35 |                      |                      | protocols                                            |
| 36 |                      |                      |                                                      |
| 37 |                      |                      |                                                      |
| 38 |                      |                      |                                                      |
| 39 | Data management      | <a href="#">#19</a>  | Plans for data entry, coding, security, and          |
| 40 |                      |                      |                                                      |
| 41 |                      |                      | storage, including any related processes to          |
| 42 |                      |                      |                                                      |
| 43 |                      |                      | promote data quality (eg, double data entry;         |
| 44 |                      |                      |                                                      |
| 45 |                      |                      | range checks for data values). Reference to          |
| 46 |                      |                      |                                                      |
| 47 |                      |                      | where details of data management procedures          |
| 48 |                      |                      |                                                      |
| 49 |                      |                      | can be found, if not in the protocol                 |
| 50 |                      |                      |                                                      |
| 51 |                      |                      |                                                      |
| 52 |                      |                      |                                                      |
| 53 |                      |                      |                                                      |
| 54 | Statistics: outcomes | <a href="#">#20a</a> | Statistical methods for analysing primary and        |
| 55 |                      |                      |                                                      |
| 56 |                      |                      | secondary outcomes. Reference to where other         |
| 57 |                      |                      |                                                      |
| 58 |                      |                      |                                                      |
| 59 |                      |                      |                                                      |
| 60 |                      |                      |                                                      |



|    |                        |                                                                     |     |
|----|------------------------|---------------------------------------------------------------------|-----|
| 1  |                        | details of the statistical analysis plan can be                     |     |
| 2  |                        |                                                                     |     |
| 3  |                        | found, if not in the protocol                                       |     |
| 4  |                        |                                                                     |     |
| 5  |                        |                                                                     |     |
| 6  | Statistics: additional | <a href="#">#20b</a> Methods for any additional analyses (eg,       | 16  |
| 7  |                        |                                                                     |     |
| 8  | analyses               | subgroup and adjusted analyses)                                     |     |
| 9  |                        |                                                                     |     |
| 10 |                        |                                                                     |     |
| 11 | Statistics: analysis   | <a href="#">#20c</a> Definition of analysis population relating to  | N/A |
| 12 |                        |                                                                     |     |
| 13 | population and         | protocol non-adherence (eg, as randomised                           |     |
| 14 |                        |                                                                     |     |
| 15 | missing data           | analysis), and any statistical methods to handle                    |     |
| 16 |                        |                                                                     |     |
| 17 |                        | missing data (eg, multiple imputation)                              |     |
| 18 |                        |                                                                     |     |
| 19 |                        |                                                                     |     |
| 20 |                        |                                                                     |     |
| 21 | <b>Methods:</b>        |                                                                     |     |
| 22 |                        |                                                                     |     |
| 23 | <b>Monitoring</b>      |                                                                     |     |
| 24 |                        |                                                                     |     |
| 25 |                        |                                                                     |     |
| 26 | Data monitoring:       | <a href="#">#21a</a> Composition of data monitoring committee       | 17  |
| 27 |                        |                                                                     |     |
| 28 | formal committee       | (DMC); summary of its role and reporting                            |     |
| 29 |                        |                                                                     |     |
| 30 |                        | structure; statement of whether it is                               |     |
| 31 |                        |                                                                     |     |
| 32 |                        | independent from the sponsor and competing                          |     |
| 33 |                        |                                                                     |     |
| 34 |                        | interests; and reference to where further details                   |     |
| 35 |                        |                                                                     |     |
| 36 |                        | about its charter can be found, if not in the                       |     |
| 37 |                        |                                                                     |     |
| 38 |                        | protocol. Alternatively, an explanation of why a                    |     |
| 39 |                        |                                                                     |     |
| 40 |                        | DMC is not needed                                                   |     |
| 41 |                        |                                                                     |     |
| 42 |                        |                                                                     |     |
| 43 |                        |                                                                     |     |
| 44 |                        |                                                                     |     |
| 45 | Data monitoring:       | <a href="#">#21b</a> Description of any interim analyses and        | 17  |
| 46 |                        |                                                                     |     |
| 47 | interim analysis       | stopping guidelines, including who will have                        |     |
| 48 |                        |                                                                     |     |
| 49 |                        | access to these interim results and make the                        |     |
| 50 |                        |                                                                     |     |
| 51 |                        | final decision to terminate the trial                               |     |
| 52 |                        |                                                                     |     |
| 53 |                        |                                                                     |     |
| 54 |                        |                                                                     |     |
| 55 | Harms                  | <a href="#">#22</a> Plans for collecting, assessing, reporting, and | N/A |
| 56 |                        |                                                                     |     |
| 57 |                        | managing solicited and spontaneously reported                       |     |
| 58 |                        |                                                                     |     |
| 59 |                        |                                                                     |     |
| 60 |                        |                                                                     |     |

|    |                      |                                                                       |          |
|----|----------------------|-----------------------------------------------------------------------|----------|
| 1  |                      | adverse events and other unintended effects of                        |          |
| 2  |                      | trial interventions or trial conduct                                  |          |
| 3  |                      |                                                                       |          |
| 4  |                      |                                                                       |          |
| 5  |                      |                                                                       |          |
| 6  | Auditing             | <a href="#">#23</a> Frequency and procedures for auditing trial       | N/A      |
| 7  |                      | conduct, if any, and whether the process will be                      |          |
| 8  |                      | independent from investigators and the sponsor                        |          |
| 9  |                      |                                                                       |          |
| 10 |                      |                                                                       |          |
| 11 |                      |                                                                       |          |
| 12 |                      |                                                                       |          |
| 13 | <b>Ethics and</b>    |                                                                       |          |
| 14 |                      |                                                                       |          |
| 15 | <b>dissemination</b> |                                                                       |          |
| 16 |                      |                                                                       |          |
| 17 |                      |                                                                       |          |
| 18 |                      |                                                                       |          |
| 19 | Research ethics      | <a href="#">#24</a> Plans for seeking research ethics committee /     | 17       |
| 20 |                      | institutional review board (REC / IRB) approval                       |          |
| 21 | approval             |                                                                       |          |
| 22 |                      |                                                                       |          |
| 23 |                      |                                                                       |          |
| 24 | Protocol             | <a href="#">#25</a> Plans for communicating important protocol        | 17       |
| 25 |                      | modifications (eg, changes to eligibility criteria,                   |          |
| 26 | amendments           | outcomes, analyses) to relevant parties (eg,                          |          |
| 27 |                      | investigators, REC / IRBs, trial participants, trial                  |          |
| 28 |                      | registries, journals, regulators)                                     |          |
| 29 |                      |                                                                       |          |
| 30 |                      |                                                                       |          |
| 31 |                      |                                                                       |          |
| 32 |                      |                                                                       |          |
| 33 |                      |                                                                       |          |
| 34 |                      |                                                                       |          |
| 35 |                      |                                                                       |          |
| 36 | Consent or assent    | <a href="#">#26a</a> Who will obtain informed consent or assent       | 9 and 17 |
| 37 |                      | from potential trial participants or authorised                       |          |
| 38 |                      | surrogates, and how (see Item 32)                                     |          |
| 39 |                      |                                                                       |          |
| 40 |                      |                                                                       |          |
| 41 |                      |                                                                       |          |
| 42 |                      |                                                                       |          |
| 43 |                      |                                                                       |          |
| 44 | Consent or assent:   | <a href="#">#26b</a> Additional consent provisions for collection and | N/A      |
| 45 |                      | use of participant data and biological                                |          |
| 46 | ancillary studies    | specimens in ancillary studies, if applicable                         |          |
| 47 |                      |                                                                       |          |
| 48 |                      |                                                                       |          |
| 49 |                      |                                                                       |          |
| 50 |                      |                                                                       |          |
| 51 | Confidentiality      | <a href="#">#27</a> How personal information about potential and      | 17       |
| 52 |                      | enrolled participants will be collected, shared,                      |          |
| 53 |                      |                                                                       |          |
| 54 |                      |                                                                       |          |
| 55 |                      |                                                                       |          |
| 56 |                      |                                                                       |          |
| 57 |                      |                                                                       |          |
| 58 |                      |                                                                       |          |
| 59 |                      |                                                                       |          |
| 60 |                      |                                                                       |          |

|    |                       |                                                                       |     |
|----|-----------------------|-----------------------------------------------------------------------|-----|
| 1  |                       | and maintained in order to protect                                    |     |
| 2  |                       |                                                                       |     |
| 3  |                       | confidentiality before, during, and after the trial                   |     |
| 4  |                       |                                                                       |     |
| 5  |                       |                                                                       |     |
| 6  | Declaration of        | <a href="#">#28</a> Financial and other competing interests for       | 18  |
| 7  |                       |                                                                       |     |
| 8  | interests             | principal investigators for the overall trial and                     |     |
| 9  |                       |                                                                       |     |
| 10 |                       | each study site                                                       |     |
| 11 |                       |                                                                       |     |
| 12 |                       |                                                                       |     |
| 13 | Data access           | <a href="#">#29</a> Statement of who will have access to the final    | 17  |
| 14 |                       |                                                                       |     |
| 15 |                       | trial dataset, and disclosure of contractual                          |     |
| 16 |                       |                                                                       |     |
| 17 |                       | agreements that limit such access for                                 |     |
| 18 |                       |                                                                       |     |
| 19 |                       | investigators                                                         |     |
| 20 |                       |                                                                       |     |
| 21 |                       |                                                                       |     |
| 22 |                       |                                                                       |     |
| 23 | Ancillary and post    | <a href="#">#30</a> Provisions, if any, for ancillary and post-trial  | N/A |
| 24 |                       |                                                                       |     |
| 25 | trial care            | care, and for compensation to those who suffer                        |     |
| 26 |                       |                                                                       |     |
| 27 |                       | harm from trial participation                                         |     |
| 28 |                       |                                                                       |     |
| 29 |                       |                                                                       |     |
| 30 |                       |                                                                       |     |
| 31 | Dissemination         | <a href="#">#31a</a> Plans for investigators and sponsor to           | 17  |
| 32 |                       |                                                                       |     |
| 33 | policy: trial results | communicate trial results to participants,                            |     |
| 34 |                       |                                                                       |     |
| 35 |                       | healthcare professionals, the public, and other                       |     |
| 36 |                       |                                                                       |     |
| 37 |                       | relevant groups (eg, via publication, reporting in                    |     |
| 38 |                       |                                                                       |     |
| 39 |                       | results databases, or other data sharing                              |     |
| 40 |                       |                                                                       |     |
| 41 |                       | arrangements), including any publication                              |     |
| 42 |                       |                                                                       |     |
| 43 |                       | restrictions                                                          |     |
| 44 |                       |                                                                       |     |
| 45 |                       |                                                                       |     |
| 46 |                       |                                                                       |     |
| 47 | Dissemination         | <a href="#">#31b</a> Authorship eligibility guidelines and any        | N/A |
| 48 |                       |                                                                       |     |
| 49 | policy: authorship    | intended use of professional writers                                  |     |
| 50 |                       |                                                                       |     |
| 51 |                       |                                                                       |     |
| 52 |                       |                                                                       |     |
| 53 | Dissemination         | <a href="#">#31c</a> Plans, if any, for granting public access to the | N/A |
| 54 |                       |                                                                       |     |
| 55 | policy: reproducible  | full protocol, participant-level dataset, and                         |     |
| 56 |                       |                                                                       |     |
| 57 | research              | statistical code                                                      |     |
| 58 |                       |                                                                       |     |
| 59 |                       |                                                                       |     |
| 60 |                       |                                                                       |     |

## Appendices

|                                                                                                                                                                                                                                        |                            |                     |                                                                                                                                                                                                |                                                  |
|----------------------------------------------------------------------------------------------------------------------------------------------------------------------------------------------------------------------------------------|----------------------------|---------------------|------------------------------------------------------------------------------------------------------------------------------------------------------------------------------------------------|--------------------------------------------------|
| 1<br>2<br>3<br>4<br>5<br>6<br>7<br>8<br>9<br>10<br>11<br>12<br>13<br>14<br>15<br>16<br>17<br>18<br>19<br>20<br>21                                                                                                                      | Informed consent materials | <a href="#">#32</a> | Model consent form and other related documentation given to participants and authorised surrogates                                                                                             | 17; Ethical approval B670201940165 - Dutch forms |
| 22<br>23<br>24<br>25<br>26<br>27<br>28<br>29<br>30<br>31<br>32<br>33<br>34<br>35<br>36<br>37<br>38<br>39<br>40<br>41<br>42<br>43<br>44<br>45<br>46<br>47<br>48<br>49<br>50<br>51<br>52<br>53<br>54<br>55<br>56<br>57<br>58<br>59<br>60 | Biological specimens       | <a href="#">#33</a> | Plans for collection, laboratory evaluation, and storage of biological specimens for genetic or molecular analysis in the current trial and for future use in ancillary studies, if applicable | N/A                                              |

### Notes:

- 32: 17; Ethical approval B670201940165 - Dutch forms The SPIRIT checklist is distributed under the terms of the Creative Commons Attribution License CC-BY-ND 3.0. This checklist was completed on 16. January 2021 using <https://www.goodreports.org/>, a tool made by the [EQUATOR Network](#) in collaboration with [Penelope.ai](#)

# BMJ Open

## The Balanced Growth project: a protocol of a single-center observational study on the involvement of the vestibular system in a child's motor and cognitive development.

|                                 |                                                                                                                                                                                                                                                                                                                                                                                                                                                                                                                                                                                                                                                                                                                                                                                                                                                                                                                                                                                                                                                                                                                                                                                                                                                                                                                                     |
|---------------------------------|-------------------------------------------------------------------------------------------------------------------------------------------------------------------------------------------------------------------------------------------------------------------------------------------------------------------------------------------------------------------------------------------------------------------------------------------------------------------------------------------------------------------------------------------------------------------------------------------------------------------------------------------------------------------------------------------------------------------------------------------------------------------------------------------------------------------------------------------------------------------------------------------------------------------------------------------------------------------------------------------------------------------------------------------------------------------------------------------------------------------------------------------------------------------------------------------------------------------------------------------------------------------------------------------------------------------------------------|
| Journal:                        | <i>BMJ Open</i>                                                                                                                                                                                                                                                                                                                                                                                                                                                                                                                                                                                                                                                                                                                                                                                                                                                                                                                                                                                                                                                                                                                                                                                                                                                                                                                     |
| Manuscript ID                   | bmjopen-2021-049165.R1                                                                                                                                                                                                                                                                                                                                                                                                                                                                                                                                                                                                                                                                                                                                                                                                                                                                                                                                                                                                                                                                                                                                                                                                                                                                                                              |
| Article Type:                   | Protocol                                                                                                                                                                                                                                                                                                                                                                                                                                                                                                                                                                                                                                                                                                                                                                                                                                                                                                                                                                                                                                                                                                                                                                                                                                                                                                                            |
| Date Submitted by the Author:   | 22-Apr-2021                                                                                                                                                                                                                                                                                                                                                                                                                                                                                                                                                                                                                                                                                                                                                                                                                                                                                                                                                                                                                                                                                                                                                                                                                                                                                                                         |
| Complete List of Authors:       | <p>Van Hecke, Ruth ; Ghent University Faculty of Medicine and Health Sciences, Department of Rehabilitation Sciences<br/>         Deconinck, Frederik J. A.; Ghent University Faculty of Medicine and Health Sciences, Department of Movement and Sports Sciences<br/>         Wiersema, Jan R.; Ghent University Faculty of Psychology and Educational Sciences, Department of Experimental Clinical and Health Psychology<br/>         Clauws, Chloe; Ghent University Faculty of Medicine and Health Sciences, Department of Rehabilitation Sciences<br/>         Danneels, Maya; Ghent University Faculty of Medicine and Health Sciences, Department of Rehabilitation Sciences<br/>         Dhooge, Ingeborg; University Hospital Ghent, Department of Otorhinolaryngology; Ghent University Faculty of Medicine and Health Sciences, Department of Head and Skin<br/>         Leyssens, Laura; Ghent University Faculty of Medicine and Health Sciences, Department of Rehabilitation Sciences<br/>         Van Waelvelde, Hilde; Ghent University Faculty of Medicine and Health Sciences, Department of Rehabilitation Sciences<br/>         Maes, Leen; Ghent University Faculty of Medicine and Health Sciences, Department of Rehabilitation Sciences; University Hospital Ghent, Department of Otorhinolaryngology</p> |
| <b>Primary Subject Heading</b>: | Ear, nose and throat/otolaryngology                                                                                                                                                                                                                                                                                                                                                                                                                                                                                                                                                                                                                                                                                                                                                                                                                                                                                                                                                                                                                                                                                                                                                                                                                                                                                                 |
| Secondary Subject Heading:      | Ear, nose and throat/otolaryngology, Paediatrics, Rehabilitation medicine                                                                                                                                                                                                                                                                                                                                                                                                                                                                                                                                                                                                                                                                                                                                                                                                                                                                                                                                                                                                                                                                                                                                                                                                                                                           |
| Keywords:                       | Audiology < OTOLARYNGOLOGY, Paediatric otolaryngology < OTOLARYNGOLOGY, PAEDIATRICS, REHABILITATION MEDICINE, PSYCHIATRY                                                                                                                                                                                                                                                                                                                                                                                                                                                                                                                                                                                                                                                                                                                                                                                                                                                                                                                                                                                                                                                                                                                                                                                                            |
|                                 |                                                                                                                                                                                                                                                                                                                                                                                                                                                                                                                                                                                                                                                                                                                                                                                                                                                                                                                                                                                                                                                                                                                                                                                                                                                                                                                                     |

SCHOLARONE™  
Manuscripts

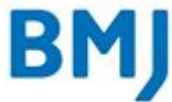

I, the Submitting Author has the right to grant and does grant on behalf of all authors of the Work (as defined in the below author licence), an exclusive licence and/or a non-exclusive licence for contributions from authors who are: i) UK Crown employees; ii) where BMJ has agreed a CC-BY licence shall apply, and/or iii) in accordance with the terms applicable for US Federal Government officers or employees acting as part of their official duties; on a worldwide, perpetual, irrevocable, royalty-free basis to BMJ Publishing Group Ltd ("BMJ") its licensees and where the relevant Journal is co-owned by BMJ to the co-owners of the Journal, to publish the Work in this journal and any other BMJ products and to exploit all rights, as set out in our [licence](#).

The Submitting Author accepts and understands that any supply made under these terms is made by BMJ to the Submitting Author unless you are acting as an employee on behalf of your employer or a postgraduate student of an affiliated institution which is paying any applicable article publishing charge ("APC") for Open Access articles. Where the Submitting Author wishes to make the Work available on an Open Access basis (and intends to pay the relevant APC), the terms of reuse of such Open Access shall be governed by a Creative Commons licence – details of these licences and which [Creative Commons](#) licence will apply to this Work are set out in our licence referred to above.

Other than as permitted in any relevant BMJ Author's Self Archiving Policies, I confirm this Work has not been accepted for publication elsewhere, is not being considered for publication elsewhere and does not duplicate material already published. I confirm all authors consent to publication of this Work and authorise the granting of this licence.

1  
2  
3 **The Balanced Growth project: a protocol of a single-center observational**  
4 **study on the involvement of the vestibular system in a child's motor and**  
5 **cognitive development.**  
6  
7

8 Ruth Van Hecke<sup>1</sup>, Frederik J.A. Deconinck<sup>2</sup>, Jan R. Wiersema<sup>3</sup>, Chloe Clauws<sup>1</sup>, Maya Danneels<sup>1</sup>,  
9 Ingeborg Dhooge<sup>4,5</sup>, Laura Leyssens<sup>1</sup>, Hilde Van Waelvelde<sup>1</sup>, and Leen Maes<sup>1,4</sup>  
10  
11

12  
13 <sup>1</sup> Ghent University, Department of Rehabilitation Sciences, Ghent, Belgium  
14

15 <sup>2</sup> Ghent University, Department of Movement and Sports Sciences, Ghent, Belgium  
16

17 <sup>3</sup> Ghent University, Department of Experimental Clinical and Health Psychology, Ghent, Belgium  
18

19 <sup>4</sup> Ghent University Hospital, Department of Otorhinolaryngology, Ghent, Belgium  
20

21 <sup>5</sup> Ghent University, Department of Head and Skin, Ghent, Belgium  
22  
23  
24

25 **Corresponding author:**

26 Ruth Van Hecke

27 Corneel Heymanslaan 10, 9000 GENT, Belgium

28 +3293322296

29 E-mail: ruth.vanhecke@ugent.be  
30  
31  
32  
33  
34  
35  
36  
37  
38  
39  
40  
41  
42  
43  
44  
45  
46  
47  
48  
49  
50  
51  
52  
53  
54  
55

56 **Keywords:** vestibular dysfunction, motor performance, cognition, neurodevelopmental disorders,  
57 children  
58  
59  
60

## ABSTRACT

**Introduction** The involvement of the vestibular system in the motor and higher (cognitive) performances of typically developing or vestibular-impaired children is currently unknown or has only scarcely been explored. Interestingly, arguments for an interaction between vestibular, motor, and cognitive functions in children can also be supported by research on children known for their difficulties in motor and/or cognitive processing (e.g. children with neurodevelopmental disorders (NDD)), as they often present with vestibular-like characteristics. Therefore, in order to elucidate this interaction, and to increase the understanding of the pathophysiology and symptomatology of vestibular disorders and NDD in children, the Balanced Growth project was developed. It includes the following objectives: [1] to understand the association between motor skills, cognitive performances, and the vestibular function in typically developing school-aged children, with special focus on the added value of the vestibular system in higher cognitive skills and motor competence; [2] to investigate whether a vestibular dysfunction (with/without an additional auditory disease) has an impact on motor skills, cognitive performances, and motor-cognitive interactions in children, and [3] to assess if an underlying vestibular dysfunction can be identified in school-aged children with NDD, with documentation of the occurrence and characteristics of vestibular dysfunctions in this group of children using an extensive vestibular test battery.

**Methods and analysis** In order to achieve the objectives of the observational cross-sectional Balanced Growth study, a single- and dual-task test protocol was created, which will be performed in three groups of school-aged children (6 – 12 years old): (1) a typically developing group (n = 140), (2) (audio)vestibular-impaired children (n = 30), and (3) children with a NDD diagnosis (n = 55) (i.e. autism spectrum disorder, attention deficit/hyperactivity disorder and/or developmental coordination disorder). The test protocol consists of several custom-made tests and already existing validated test batteries and includes a vestibular assessment, an extensive motor assessment, eight neurocognitive tests, a cognitive-motor interaction assessment, and includes also additional screenings to control for potential confounding factors (e.g. hearing status, intelligence, physical activity, etc.).

**Ethics and dissemination** The current study was approved by the ethics committee of Ghent University Hospital on June 4th 2019 with registration number B670201940165 and is registered at Clinical Trials (clinicaltrials.gov) with identifier NCT04685746. All research findings will be disseminated in peer-reviewed journals and presented at vestibular as well as multidisciplinary international conferences and meetings.

**Trial registration number** ClinicalTrials.gov Registry NCT04685746



## STRENGTHS AND LIMITATIONS OF THIS STUDY

- To our knowledge, this is the first extensive study assessing the interaction between vestibular, motor, and cognitive functions in typically developing children on the one hand, and vestibular-impaired children and children with a neurodevelopmental (NDD) diagnosis on the other hand.
- The Balanced Growth protocol consists of a very extensive vestibular, motor and cognitive test protocol, which also includes additional screenings to control for a lot of important confounding factors (e.g. hearing status, intelligence, static/dynamic visual acuity, physical activity, comorbidity, etc.).
- Ultimately, it is expected that this project may result in optimized diagnostic and treatment procedures for the vestibular and NDD populations, which is of great importance for their quality of life.
- Due to its innovative character, this study includes a mainly exploratory design in the (heterogeneous) NDD group, and may, therefore, result in preliminary conclusions only.

## INTRODUCTION

The balance system is a complex sensorimotor system which comprises the peripheral vestibular apparatus, the somatosensory and visual system, brainstem, cerebellum and the cortex. The peripheral portion of the vestibular system is located in the inner ear and consists of three semicircular canals (SCC) and two otolith organs providing complementary information about rotational and translational head movements relative to gravity. It provides postural control and a stabilized vision during head movements, which are reflexively maintained by the vestibulo-ocular (VOR), vestibulo-spinal and vestibulo-cervical reflexes. In addition, together with centrally integrated proprioceptive and visual stimuli, the vestibular system contributes to a coherent perception of the environment and movements through it<sup>1-3</sup> (Figure 1).

The contribution of the vestibular apparatus in the primary, reflexive functions of the vestibular system has been extensively studied, especially in a clinical adult population with vestibular impairments<sup>4-7</sup>. Also in children, the effect of a vestibular impairment on postural control, gaze stabilization and the attainment of motor developmental milestones has been described before<sup>8</sup>. The first studies on this topic mainly focused on the motor development and balance function in very young (< 2 years) children<sup>9-11</sup> and/or children with sensorineural hearing loss (SNHL) and a vestibular dysfunction<sup>12-16</sup>. Later on, several studies have linked these motor and balance problems to vestibular outcome measures and could demonstrate that motor performances were even more impaired when a vestibular dysfunction was superimposed to the auditory dysfunction<sup>17-21</sup>. Although literature on this topic has emerged the last decade, several questions still remain unanswered. Most studies focused on specific balance functions in children with audiovestibular dysfunctions, while studies on the impact on fine motor skills, for which an adequate VOR-function is needed, or on motor tasks that are less dependent on the balance system are rather scarce<sup>22</sup>. In addition, literature on the impact of more specific conditions, such as unilateral or partial vestibular loss (e.g. SCC dysfunctions vs an otolith impairment), or research into the role of etiology or timing of the vestibular dysfunction (e.g. before or after the motor milestones were achieved) on the development of motor competence is limited or even non-existing<sup>17 23 24</sup>. These gaps in the current literature warrant further research, which can also be supported by the fact that an adequate vestibular rehabilitation approach at a young age is suggested to be beneficial<sup>3 25 26</sup>. Although motor competence has been extensively studied in typically developing children, an association between vestibular function testing and a child's motor development has never been studied in a healthy pediatric cohort before. This knowledge is, however, considered to be key to a better understanding of the impact of the vestibular system on a child's motor development.

Besides the involvement of the vestibular system in balance and postural performances and other reflexive primary functions, growing evidence is highlighting its important role in higher (cognitive) functions as well<sup>27 28</sup> (Figure 1). In relation to that, several studies demonstrated a widespread ascending vestibular network throughout the cerebral (sub)cortex involved in cognitive, social and emotional processing that goes far beyond the reflexive brainstem circuitry<sup>29 30</sup>, which may explain the influence

1 of vestibular impairments on cognitive, psychosocial and educational skills in children. For example, it  
2 has been suggested that vestibular impairments may be linked to reduced visuo-spatial abilities,  
3 attentional deficits, poor reading skills, etc.<sup>27 31-34</sup>, which are often reported by the patient's (or their  
4 parents') as well. These hypotheses on the vestibulo-cognitive interaction in literature, however, are  
5 mainly based on animal studies, imaging and clinical studies in healthy and vestibular-impaired adults<sup>27-  
6 30 35-40</sup>. Currently, only one study in the pediatric vestibular patient population supports the vestibulo-  
7 cognitive interaction in children. Lacroix and colleagues<sup>32</sup> assessed four neuropsychological functions  
8 in thirteen vestibular-impaired participants with a mean age of ten years and five months (specific age  
9 information is lacking). Although the selective visual attention task did not reveal any differences, the  
10 vestibular-impaired group had significantly lower scores on the visuospatial working memory, mental  
11 rotation, and space orientation tasks compared to a group of sixty typically developing peers. The study,  
12 however, had several limitations, which urge for further research. For example, the use of a limited or  
13 heterogeneous vestibular test battery (in some of the participants), not taking into account hearing status  
14 as an important confounding factor, and the use of tests that may have resulted in floor or ceiling effects  
15 were reported. In addition, objective vestibular function testing in the control group was not  
16 reported/performed, and the authors only included cognitive tasks in a single-task condition, while a  
17 dual-task setting may be an important added value in a vestibular-impaired population<sup>41 42</sup>. To our  
18 knowledge, the vestibulo-cognitive interactions have never been assessed in a typically developing  
19 cohort.

20 Interestingly, arguments for an interaction between vestibular, motor, and cognitive functions  
21 in children can also be supported by research on children known for their difficulties in motor and/or  
22 cognitive processing (e.g. children with neurodevelopmental disorders (NDD)), as they often present  
23 with vestibular-like characteristics<sup>31</sup>. For example, it has been repeatedly reported that children with  
24 NDD often have more difficulties in balance and postural stability, compared to their typically  
25 developing peers, especially in conditions where vestibular feedback was the sole accurate source of  
26 sensory information<sup>43-46</sup>. Unfortunately, research on the vestibular function in children with NDD is  
27 scarce, lacks quality and/or does not use an extensive vestibular test battery including recent assessment  
28 techniques (see a recent systematic review for more details<sup>31</sup>). In addition, none of the current studies  
29 investigating vestibular function in a NDD population, linked the vestibular responses with cognitive  
30 and/or motor outcome measures.

31 Therefore, to increase the understanding of the pathophysiology and symptomatology of  
32 vestibular disorders (and neurodevelopmental disorders) in children, the Balanced Growth project was  
33 developed. This project aims to elucidate the relationship with and the involvement of the vestibular  
34 system in children's cognitive and motor performances. It includes the following objectives: [1] to  
35 understand the association between motor skills, cognitive performances, and the vestibular function in  
36 typically developing school-aged children, with special focus on the added value of the vestibular system  
37 in higher cognitive skills and motor competence; [2] to investigate whether there is an association

1  
2  
3  
4  
5  
6  
7  
8  
9  
10  
11  
12  
13  
14  
15  
16  
17  
18  
19  
20  
21  
22  
23  
24  
25  
26  
27  
28  
29  
30  
31  
32  
33  
34  
35  
36  
37  
38  
39  
40  
41  
42  
43  
44  
45  
46  
47  
48  
49  
50  
51  
52  
53  
54  
55  
56  
57  
58  
59  
60

1 between a vestibular dysfunction (with/without an additional auditory disease), motor skills, cognitive  
2 performances, and motor-cognitive interactions in children, and [3] to assess if an underlying vestibular  
3 dysfunction can be identified in school-aged children with NDD, with documentation of the occurrence  
4 and characteristics of vestibular dysfunctions in this group of children using an extensive vestibular test  
5 battery. Ultimately, it is expected that this project may result in optimized diagnostic and treatment  
6 procedures for these populations, which is of great importance for their quality of life.

7

For peer review only

## METHODS AND ANALYSIS

### Study protocol and setting

In order to achieve the objectives of the observational Balanced Growth project, a vestibular, motor and cognitive single- and dual-task test protocol was created, based on a combination of several custom-made tests and already existing validated test batteries. This project is a collaboration between the departments of rehabilitation, psychological, medical and movement sciences of the Ghent University and the otolaryngology department of the Ghent University Hospital.

The data collection for the first two objectives of this project started in July 2019 and the project will end in October 2023. The first exploratory study focusing on the impact of a vestibular dysfunction on the cognitive development of children with a uni- or bilateral vestibular dysfunction, irrespective of their hearing status (objective 2), is expected to be submitted for publication in February 2021. However, data collection in the context of objective 2 will continue until March 2023 in order to additionally assess the impact on motor development and on cognitive-motor interference in comparison with typically developing on the one hand and auditory-impaired children (without a vestibular dysfunction) on the other hand, both matched for age, (hearing loss), gender, handedness and randomization order of the cognitive test battery. Since the study in the typically developing group (objective 1) requires more participants (cfr. sample sizes), this study is planned to be finished by November 2022. Currently (January 2021), 130 examination sessions were completed ( $n = 65$ ). The last study (objective 3) was planned to be initiated in June 2020, however, due to the COVID-19 pandemic, the start of this study was postponed to June 2021, of which the last data collection is foreseen in June 2022.

### Eligibility criteria and recruitment procedure

Three groups of school-aged children (6 – 12 years old) will be included in the Balanced Growth study: (1) a typically developing group, (2) (audio)vestibular-impaired children, and (3) children with a NDD diagnosis.

The typically developing cohort is recruited through convenience sampling with the help of schools (in the region of Ghent, Flanders). All 6-to-12 year old children are deemed eligible, however, children with hearing, vestibular, neurodevelopmental, psychiatric and/or musculoskeletal disorders, known to the parent or legal guardian and assessed using questionnaires (cfr. *Infra*), are excluded. In addition, children with an estimated intelligence score lower than 70 (cfr. *infra*) are also excluded from the healthy group.

The children with (audio)vestibular dysfunctions are recruited from the otolaryngology department of the Ghent University Hospital. Every child between six and twelve years old diagnosed with an (audio)vestibular dysfunction and recently (< 6 months) tested with an extensive auditory and vestibular test battery, is invited to participate in our Balanced Growth study. At the otolaryngology department, the vestibular diagnosis is well-established by the use of an extensive and age-appropriate vestibular test protocol. It includes an anamnestic procedure, an oculomotor, a rotatory and caloric (water) irrigation

1 test, a video Head Impulse Test (vHIT) in all planes of the semicircular canals (SCC), and a cervical  
 2 (air-conduction) and ocular (using a minishaker) Vestibular Evoked Myogenic Potential (c/oVEMP)  
 3 assessment. The group of children with an isolated hearing impairment (objective 2), are also recruited  
 4 at the Ghent University Hospital, matched for their hearing loss to the (audio)vestibular-impaired group.  
 5 The study participants in objective 3, i.e. children with a NDD diagnosis, will be recruited at special  
 6 school services, rehabilitation centers, centers for developmental disorders, and by private physical  
 7 therapists. Neurodevelopmental disorders are a heterogeneous group of psychiatric conditions arising  
 8 early in life and characterized by developmental deficits<sup>47</sup>. These deficits include, amongst others,  
 9 dysfunctions in cognitive processes (e.g. attention, impulsivity), speech (e.g. stuttering), (psycho)social  
 10 skills (e.g. non-verbal communication, social reciprocity), and motor coordination. In the context of the  
 11 current project, only children with the common and often co-occurring Autism Spectrum Disorder  
 12 (ASD), Attention Deficit Hyperactivity Disorder (ADHD), and/or Developmental Coordination  
 13 Disorder (DCD) diagnosis will be included. All participants and their parents will first receive  
 14 comprehensive oral and written information on the objectives and procedures of the study.

### 15 Sample size

16 The sample size of the *typically developing group* was arbitrarily defined as a minimum of 140  
 17 participants (at least 20 subjects per age over the age range of 6 – 12 years old), since an appropriate  
 18 sample size calculation could not be based on previous literature.

19 Two studies were consulted to serve as input for the sample size calculation of *the vestibular-*  
 20 *impaired group*<sup>20 32</sup>. These studies assessed the impact of a vestibular dysfunction on the motor  
 21 (backward balance beam walking)<sup>20</sup> and cognitive performances (spatial span task)<sup>32</sup> in children, and  
 22 correspond best to the second objective of the current research project. Table 1 depicts all input values  
 23 for the calculation. Both studies resulted in a power of 0.8 (SAS Power and Sample Size tool). However,  
 24 given the current pool of patients at the Ghent University Hospital, and taking into account possible  
 25 dropout, the authors aim at 30 vestibular-impaired children to be included in this study.

26 *Table 1. Input values for the sample size calculation of the vestibular-impaired group (objective 2).*

| Study                 | Parameter            | Groups                                  | Means | standard deviation | $\alpha$ level   | Sample size | Power level |
|-----------------------|----------------------|-----------------------------------------|-------|--------------------|------------------|-------------|-------------|
| Maes et al. (2014)    | Motor quotient (KTK) | Control group                           | 90    | 13,78              | $\alpha = 0.05$  | N = 12      | 0.8         |
|                       |                      | Experimental group (vesibular-impaired) | 63,17 | 6,45               |                  | N = 12      |             |
| Lacroix et al. (2020) | Spatial span         | Control group                           | 8.2   | 2.3                | $\alpha = 0.027$ | N = 60      | 0.8         |
|                       |                      | Experimental group (vesibular-impaired) | 6.3   | 1.9                |                  | N = 13      |             |

27  
 28 The power analysis for the *NDD population* was performed based on the study of Lotfi et al.  
 29 (2017)<sup>48</sup>, in which vestibular examination was completed in a group of 33 children with NDD (i.e.

1  
2  
3 1 ADHD). The sample size calculation was based on the rotatory chair gain, a parameter which is  
4 2 considered to be a key measure in vestibular research for the detection of the horizontal semicircular  
5 3 canal function (mid-frequency function), and which was implemented in the current protocol as well.  
6 4 The authors observed a significant increase ( $\alpha = 0.001$ ; independent sample t-test; power < 20%) in the  
7 5 experimental group (mean: 49.16; SD: 13.86) compared to the control group (mean: 43.60; SD: 9.89)  
8 6 for the outcome parameter 'gain at 0.01 Hz'. In order to achieve significant differences with an  
9 7 appropriate power (accepting an  $\alpha$  level of 0.05 and a power level of 0.8), this calculation resulted in a  
10 8 sample size of 51 participants. Taking into account possible drop outs, it is foreseen to include 55 NDD  
11 9 participants.

## 10 **Outcome measures**

11 11 The Balanced Growth protocol consists of vestibular, cognitive, motor, and cognitive-motor interaction  
12 12 assessments, and includes also several additional screenings to control for potential confounding factors  
13 13 (Figure 2).

14 14 The screenings include an auditory, an intelligence, and an ophthalmological screening, and an  
15 15 anamnestic and several validated questionnaires (cfr. infra). After parental permission and their written  
16 16 informed consent, each participant will be invited for two separate test moments, which will take one  
17 17 hour and a half each. During the first session, the cognitive-motor interaction, the overall motor  
18 18 performance, vestibular, auditory, and ophthalmological function will be assessed. During the second  
19 19 moment, an intelligence screening and an extensive neuropsychological investigation will be performed.  
20 20 To avoid fatigue, the latter test moment will only be executed in the morning and the two sessions will  
21 21 never take place on the same day. The parents will be asked to fill in the questionnaires during one of  
22 22 the two appointments. During the cognitive test appointment, the eight neurocognitive tests will be  
23 23 performed in a randomized order (Latin square counterbalanced design) in order to minimize learning  
24 24 and order effects. The vestibular and motor assessments will be performed in the order as described  
25 25 below.

## 26 **Vestibular assessment**

27 27 Each vestibular organ consists of five parts, two otolith organs (utricle and saccule) and three SCCs  
28 28 (lateral, anterior and posterior SCC). To obtain information on the functionality of these five parts, all  
29 29 participants will be assessed with a vHIT, cVEMP, and oVEMP test (Figure 3).

30 30 Firstly, the vHIT will be executed, which assesses the superior and inferior vestibular nerve and  
31 31 the functioning of the six semicircular canals for high-frequency movements, using the vestibulo-ocular  
32 32 reflex (VOR). vHIT measurements will be conducted using the ICS Impulse system (GN Otometrics,  
33 33 Taastrup, Denmark) and accompanying software 'Otosuite'. Before each vHIT assessment, the goggles  
34 34 will be configured and individualized by a calibration procedure (15° saccades in horizontal plane) and  
35 35 an additional calibration check (i.e. evaluating if the eye and head velocity traces match while slowly



1 rotating the head). To avoid slippage of the goggles, the elastic band will be tightened firmly on the head  
2 and will not be touched while performing the impulses. The children will subsequently be instructed to  
3 sit on a chair and fixate an attractive visual target (i.e. movie on a tablet) at 1.50 m distance. Meanwhile,  
4 an examiner, experienced in pediatric vestibular function testing, will perform unpredictable head  
5 movements (10° - 20° amplitude) in, respectively, the horizontal, LARP (to stimulate the left anterior  
6 and right posterior canal), and RALP plane (to stimulate the right anterior and left posterior canal). To  
7 facilitate a smooth registration of the pupil, the measurements will be conducted in a well-lit room. Prior  
8 to interpretation of the results, the data will be thoroughly cleaned according to the following criteria:  
9 (1) head velocity between 120 (vertical) or 150 (horizontal) and 250 °/s and (2) head bounce below 25  
10 % of the peak head velocity<sup>49 50</sup>. Records with very noisy eye traces or clear eye blinks will be excluded,  
11 based on the video recording. After this data cleaning, at least 10 accepted impulses in each direction  
12 will be included. The measured gain (of the VOR) (%), the symmetry between the left and right side  
13 (%), and the presence of covert/overt saccades (n, and % of the performed HITS) will be taken as  
14 outcome measures of this test.

15 The integrity of the saccule and the inferior vestibular nerve (by means of the vestibulo-cervical  
16 reflex, VCR), will be investigated by a *cVEMP test*, using the Neuro-Audio equipment (version 2010,  
17 Neurosoft, Ivanovo, Russia) and accompanying software. For the *cVEMP*, air-conducted 500 Hz tone  
18 bursts of 95 dBnHL (119 dB SPL) will be presented monaurally through insert earphones to elicit the  
19 responses, and the response will be measured using four small self-adhesive surface electrodes (Blue  
20 Sensor, Ambu) applied on the upper 1/3rd part of the sternocleidomastoid muscle (SCM) (active), on  
21 the sternum just beneath the interclavicular ligament (reference), and on the nasion (ground). A  
22 minimum of 100 sweeps will be presented per trial, and at least two trials will be administered to ensure  
23 reproducibility of the response. Contraction of the SCM muscle, necessary for this examination, will be  
24 achieved by lifting and rotating the child's head to the non-stimulus side in supine position. Additionally,  
25 a pre-stimulus EMG measurement of at least 20 ms will be conducted for calculation of the background  
26 EMG activity. Outcome measures that will be included in the database are the absolute latencies of P1  
27 and N1 (ms), rectified interpeak amplitude (raw peak-to-peak amplitude/averaged EMG level; according  
28 to the Neurosoft software), asymmetry ratio (%), and absence/presence of the *cVEMP*-response. The  
29 *oVEMP test*, which is carried out with the same Neuro-Audio equipment, will be used to examine the  
30 functioning of the utricle and the superior vestibular nerve (by means of the VOR). To provoke this  
31 specific VOR-response, a mini-shaker (500 Hz stimulus (2-2-2 ms) with an intensity of 140 dB force  
32 level) will be used. In supine position, an upward gaze of 30° will be ensured by a fixation mark on the  
33 ceiling. If necessary, a smartphone playing a movie will be attached to the wall to elicit the upward gaze.  
34 The responses will be measured using electrodes on the inferior oblique muscle just below the lateral  
35 canthus of the eye, the reference electrode next to the medial eye canthus on the nose, and the common  
36 electrode on the nasion<sup>51</sup>. For the *oVEMP* measurement, a minimum of 60 sweeps will be presented per



1 trial. The absolute latencies of N1 and P1 (ms), interpeak amplitude ( $\mu\text{V}$ ), asymmetry ratio (%) and  
2 absence/presence of the oVEMP-response will be the reported outcome measures.

3 Although the vestibular-impaired children (objective 2) will already have been extensively  
4 tested for their vestibular function at the Ghent University Hospital (cfr. supra), they will receive an  
5 additional vestibular screening similar to the one above, to ensure the same test conditions (e.g.  
6 examiner, test location, etc.) as the other two groups and to evaluate possible aberrations compared to  
7 the last comprehensive test moment in the hospital. The latter may be possible in several fluctuating  
8 vestibular disorders (e.g. vestibular dysfunction as a result of a congenital Cytomegalovirus infection).

9 To assess the occurrence and characteristics of vestibular dysfunctions in children with a NDD  
10 compared to a typically developing group (objective 3), *rotatory chair testing* including a visual  
11 suppression test will be included as well. The rotatory chair test (version 1.70; Toennies Nystagliner,  
12 Hochberg, Germany), a sinusoidal harmonic acceleration test (SHAT), investigates the superior  
13 vestibular nerve and horizontal canal function for mid-frequency movements. The child will be asked  
14 to sit on an age-appropriate adapted rotatory chair<sup>52</sup>, with the head fixated by a neck pillow and  
15 headband. While the rotatory chair will start to move, the examiner will continuously talk with the  
16 participants, keeping the children comforted but alert. Alertness will be stimulated by age-appropriate  
17 mathematical exercises. The test will be performed at 0.16, 0.04 and 0.01 Hz, consecutively, with a peak  
18 velocity of 60 degrees per second. Lastly, in order to assess visual suppression of the VOR and central  
19 vestibular function as well, one extra condition at 0.16 Hz will be performed with a small light source  
20 attached to the chair in front of the child. Electronystagmography software will be used to register  
21 horizontal as well as vertical eye movements, with electrodes placed bitemporally and a ground  
22 electrode on the forehead to register horizontal eye movements. A monocular infra- and supraorbital  
23 electrode placement will be adopted to monitor eye blinks. The response parameters gain (%), phase ( $^{\circ}$ )  
24 and asymmetry (%) will be calculated<sup>53</sup>.

25 Lastly, in order to assess the contribution of the vestibulo-ocular reflex during head movements,  
26 a dynamic visual acuity (DVA) test will be performed as well. The execution and stimulus parameters  
27 are described in the ‘confounding factors’ section (cfr. visual screening).

## 28 Motor assessment

29 To investigate motor competence, a validated motor test will be applied, the *Movement Assessment*  
30 *Battery for Children*, 2<sup>nd</sup> edition – Dutch version (M ABC 2 NL<sup>54</sup>). This test battery is one of the most  
31 widely used assessment tools to evaluate a child’s (3 - 17 years old) motor performance, which involves  
32 children completing eight fine and gross motor tasks grouped in three categories: fine motor skills,  
33 aiming and catching, and balance. These eight different and age-appropriate tasks will be executed in  
34 accordance to the user manual, and will yield a total score, subscale scores, and item scores<sup>54</sup>.

35 Within the scope of the current project and to obtain more detailed information on dynamic and  
36 static balance function, the backward balance beam walking subtest of the *Korperkoordination Test fur*

1  
2  
3 1 *Kinder (KTK<sup>55</sup>)* and posturography will be performed as well. For the posturographic assessment, the  
4 2 *modified Clinical Test of Sensory Interaction on Balance (m-CTSIB<sup>56</sup>)* will be executed, which is  
5 3 designed to assess the static balance performance and the interaction and use of the most important  
6 4 sensory inputs during postural stability (i.e. vision, somatosensory, and vestibular information). During  
7 5 30 seconds, the participants will be asked to stand barefoot with both feet together (romberg stance) in  
8 6 four different conditions. In condition one, all sensory systems (i.e. vision, somatosensory, and  
9 7 vestibular) will be available for maintaining balance. In condition two, the children will be asked to do  
10 8 the same while blindfolded. In condition three, the romberg stance will have to be performed on a foam  
11 9 pad (Airex AG, Sins, Switzerland, 41 cm × 50 cm × 6 cm). During the fourth and most difficult  
12 10 condition, the participant will be asked to stand blindfolded on a foam pad. Each condition will include  
13 11 3 trials until the maximum amount of 30 seconds is achieved. The trial with the longest duration will be  
14 12 selected for analysis. This test will be performed on a force platform, a Wii Balance Board© (Nintendo  
15 13 Co., Ltd.), using the Colorado University BrainBLoX software<sup>57</sup>. Calculated by a custom-made code in  
16 14 MATLAB (The MathWorks, Inc. Natick, Massachusetts, United States) the following outcome  
17 15 parameters will be included: area under the curve in both anterior-posterior direction and medial-lateral  
18 16 direction, the center of pressure path length (cm), the sway velocity (m/s), and the 95% confidence  
19 17 ellipse area (cm<sup>2</sup>). An overview of the motor test battery is depicted in Figure 4. During the KTK subtest  
20 18 the participants will be asked to walk barefoot and backwards on three balance beams decreasing in  
21 19 width (3 m length - 6, 4.5 and 3 cm width, respectively). For each beam, three trials will be executed,  
22 20 preceded by one practice trial. A maximum of 24 steps (8 per trial) will be counted for each balance  
23 21 beam, with a maximum of 72 steps.

## 22 Cognitive assessment

23 Preceded by an intelligence screening (cfr. infra), the cognitive part of the protocol includes eight  
24 24 neuropsychological tests, which were selected based on the six neurocognitive domains of the DSM-5  
25 25 (Diagnostic and Statistical Manual of Mental Disorders, Fifth Edition<sup>47</sup>; Perceptual-motor function,  
26 26 learning and memory, social cognition, language, complex attention, and executive function) (Figure 5).  
27 27 All included cognitive tests are frequently reported and found to be valid for the intended target  
28 28 population. Noteworthy, as hearing impairment is often present in several target populations of the  
29 29 current project (objectives 2 and 3), during all included cognitive tests only non-auditory stimuli will be  
30 30 used and the neurocognitive domain ‘language’ will not be assessed separately. To avoid learning and  
31 31 order effects, the cognitive tests will be executed in a Latin square counterbalanced design.

32 A computerized spatial span task, which assesses *visual-spatial short term memory* (learning  
33 33 and memory – DSM-5), was created using the Psychology Experiment Building Language (PEBL)  
34 34 software<sup>58</sup>. During this task, administered on a touch screen monitor (Prolite T2253MTS-B1, 22”,  
35 35 Iiyama, Japan), the participants will see nine squares (3 x 3 cm, resolution 1440 x 900) sequentially  
36 36 changing colors (stimulus rate: 1000 ms) (Figure 6). They will be asked to reproduce this sequence by

1 touching the squares with their preferred hand in the same order as the squares were changing colors.  
2 Preceded by three practice items of a two-square sequence, there will be two test trials in each level of  
3 span length, increasing from 2 to 9. The sequence length will be increased by one, following a correct  
4 trial in one of the two trials within a span length, whereas the test will be terminated when the child fails  
5 two consecutive trials at any level of span length. All sequences will be selected randomly from the  
6 software, with the constraint that a square could be included only once in each sequence. The measures  
7 obtained from this cognitive test are: the longest span (n), amount of correct squares (n, %), amount of  
8 incorrect squares (n, %), number of correct trials (n, %), and the response rate (ms).

9 Similar to the previous task, a digit span task was programmed using the PEBL software. In this  
10 task, assessing *visual short term memory* (learning and memory – DSM-5), participants will be  
11 instructed to recall visually presented sequences of digits (1000 ms stimulus interval) by typing the  
12 sequence in the exact order as it appeared. A series of digits in black font (6.4 cm, 1440 x 900 resolution)  
13 will be randomly presented on a monitor (Prolite T2253MTS-B1, 22", Iiyama, Japan) increasing in  
14 length (2–9 digits) (Figure 7). With their preferred hand, children will be instructed to repeat the  
15 sequence on an adapted keypad (i.e. larger keys). Two trials per level, starting with a sequence of 2  
16 digits and gradually increasing to 9 digits, will be presented. Difficulty of the task will increase, if one  
17 or both trials are correct. The task will be terminated after an error on both items of one difficulty level.  
18 The dependent measures of interest are the length of the longest correct list (digit span, n), number of  
19 correct digits (n, %), number of incorrect digits (n, %), number of correct trials (n, %), and mean  
20 response rate (ms).

21 A child's ability to recognize emotions from facial expressions (social cognition – DSM-5) will  
22 be assessed using the *emotion recognition* subtest from the NEPSY-II NL test battery (Developmental  
23 Neuropsychological Assessment, Second Edition, Dutch version<sup>59 60</sup>). This non-verbal subtest consists  
24 of four tasks that assess the ability to recognize emotions (happy, sad, anger, fear, disgust, and neutral)  
25 from photographs of children's faces. During the first condition, the participants will be asked to tell the  
26 examiner if the two photographs on display indicate the same emotion. For the second condition, the  
27 children will see three or four photographs and will be instructed to select two faces expressing the same  
28 feeling. The third condition consists of a task in which the participants will be asked to select one out of  
29 four faces from the bottom of the page which represents the same feeling as the face at the top of the  
30 page. Finally, during the last condition (> 6 years only), one photograph will be shown for 5 seconds,  
31 after which the participants will be asked to point out two photographs out of six with the same emotion  
32 as the face in the photograph previously shown to them. During this test, a total score (n) ranging from  
33 1 to 25 (6 years) or 1 to 36 (> 6 years) will be reported as outcome measure, with higher scores reflecting  
34 better ability to recognize emotions.

35 *Visual sustained and selective attention* (complex attention – DSM-5) will be measured using a  
36 computerized continuous performance task, programmed in PEBL (Figure 7). In this task, the children  
37 will see a sequence of digits (6.4 cm; resolution 1440 x 900) on a computer monitor (Prolite T2253MTS-

1 B1, 22”, Iiyama, Japan). The participants will be instructed to press the space bar of the keyboard in  
2 front of them with their preferred hand every time they see a digit 9 that is preceded by a digit 1 (GO  
3 stimulus), but to suppress a response in any other case. A practice item will first be administered to  
4 ensure that the child understands the task. Throughout the task, a total of 540 digits will appear at a rate  
5 of 1 per second (total duration: 9 minutes). The digits will be classified into three blocks (180 digits  
6 each) with the target (a 1 followed by a 9) occurring 15 times per block. This task results in six outcome  
7 variables: [1] omissions (a participant fails to press the button after the target appears) (n), [2]  
8 commissions (“false alarm”, when a participant presses the button for a non-target) (n), [3] total amount  
9 of errors (n), [4] sustained attention which is measured by calculating the change in hit and false alarm  
10 rates throughout the task (across the 3 blocks), [5]  $\beta$ , and [6]  $d'$ .  $\beta$  is a measure of the participant’s  
11 likelihood to press the button for both targets and non-targets and is, therefore, considered a measure of  
12 impulsivity, whereas  $d'$  is a global measure of visual selective attention that combines total hits and false  
13 alarms<sup>61</sup>.

14 The *inhibition* subtest, selected from the NEPSY II NL, will measure the child’s ability to inhibit  
15 a natural response and to switch between automatic and inhibitory response types (executive function –  
16 DSM-5). Black and white shapes or arrows will be shown to the participants, who will be instructed to  
17 respond as quickly as possible. The test will be performed in three conditions: “Naming”, where the  
18 child will be asked to name the shape or say the direction of the arrow without making mistakes;  
19 “Inhibition”, where the child will have to provide the opposite of the correct response (e.g., say “circle”  
20 when a square is presented); and “Switching” (> 6 years only), where the child will have to switch  
21 between providing the correct response and the opposite response depending on the color of the shape  
22 or arrow. The dependent measures of interest are: total amount of self-corrected errors during each  
23 condition (n), total amount of uncorrected errors during each condition (n), total amount of errors during  
24 each condition (n), the time needed to complete each condition (s).

25 To assess *visuo-spatial and visual working memory*, categorized by the DSM-5 as executive  
26 functions, a backward spatial and digit span task were included in the protocol. With the same  
27 experimental setting and outcome variables as the previously mentioned ‘spatial span’ and ‘digit span’  
28 tasks, the participants will be instructed to recall digits and sequences of squares as presented on a  
29 computer monitor, yet in the reverse order as displayed. Additionally, the span difference between the  
30 forward and backward subtask will be calculated as well.

31 To limit the overall test duration, but to receive more information on the participants’ executive  
32 functions, the parent-report questionnaire Behavior Rating Inventory of Executive Function (BRIEF)  
33 will be used to assess *executive functions in everyday situations*. The overall score and subscores (n) of  
34 this validated questionnaire consisting of 86 items (3-point Likert scale) will be reported as response  
35 parameters.

36 Lastly, to test *perceptual-motor function* (DSM-5), the validated Beery-Buktenica  
37 Developmental Test of Visual-Motor Integration (VMI – 6th edition<sup>62</sup>), and its two supplementary tests

(visual perception (VP) and motor coordination (MC)), will be administered. During the VMI, children will be instructed to copy developmentally ordered geometric forms. All 30 items will be scored based on the objective scoring criteria outlined in the user manual, with a maximum score of 30. Additionally, the two supplementary tests VP and MC will be performed as well. They contain the same geometric shapes as used in the VMI test. The VP test focuses on children's ability to visually discriminate by asking them to look at a series of pictures and select the geometric figure that matches a target figure from a series of choices. The MC subtest assesses children's ability to trace forms within the given boundaries. Again, the instructions and scoring principles of the user manual will be applied, which will result in 'total number of correct drawings' (n), 'total number of correct identified forms' (n) and 'total number of correctly completed shapes' (n) as the outcome parameters.

### Cognitive-motor interaction assessment

Although the motor and cognitive single-task conditions represent a lot of children's activities of daily living (e.g. performing cognitive tasks at school in a sitting position), a dual-task assessment, simultaneously performing a cognitive and motor task, will be included as well to represent activities of daily living even more accurately in the (audio)vestibular-impaired group (objective 2)<sup>41</sup>. During the *cognitive-motor interaction* assessment, children will be asked to walk on an adaptive walking treadmill (Xiaomi WalkingPad C1®; Xiaomi Běijīng, China; 144.9 cm x 52.8 cm x 11.7 cm), while performing the NEPSY II NL inhibition task (cfr. supra). In order to normalize the walking pattern first, each child will start with a familiarization period with a maximum duration of five minutes. Then, the participant will be asked to walk at a self-selected pace without additional task (single-task walking condition). After 30 seconds, the previously described inhibition task will be introduced (dual-task condition) in an identical way, with each condition of the inhibition task preceded by a practice item. The test duration of the cognitive-motor interaction assessment will be 10 minutes. Using the Xiaomi Walkingpad software and two cameras (D3300, Nikon, Tokyo, Japan – operating at 50 frames/second for the sagittal plane, and D500, Canon USA, Inc., Melville, NY, USA – operating at 30 frames/second for the frontal plane) (Figure 8) information on a variety of spatiotemporal parameters will be collected: step width (cm), based on the frontal images, and stride and step length (cm), step and stride time (s), and walking velocity (cm/s) based on the sagittal images. For the assessment of the cognitive performance during the dual-task setting, the same response parameters of the single-task modality of the inhibition task (cfr. supra) will be used during the analysis.

### Secondary outcome measures and potential confounding factors

While creating the Balanced Growth protocol, several potential influencing factors and effects were taken into account. Firstly, given the close anatomical relationship of the vestibular and auditory organs, the *hearing status* of each participant will be evaluated. Moreover, as hearing impairment is often present in the target population of the current project, all included cognitive tests are non-auditory and



1  
2  
3 1 each test instruction will be given verbally as well as visually. The auditory test battery includes  
4 2 otoscopy, tympanometry, transient-evoked and distortion product otoacoustic emissions (TE/DPOAEs;  
5 3 Sentiero desktop, Path Medical, Germany). Secondly, as neuropsychological performances may be  
6 4 related to *intelligence*, an intelligence screening will be performed prior to the entire cognitive  
7 5 assessment. For this intelligence screening a short version of the Wechsler Intelligence Scale for  
8 6 Children (WISC-V-NL) will be used<sup>63</sup>: matrix reasoning, similarities, vocabulary, and block design.  
9 7 Based on this short version an estimated intelligence score will be reported.

10 8 As the visual system is also an important sensory system involved in cognitive and motor skills, a *visual*  
11 9 *screening* will be performed as well. Both static visual acuity (SVA) and dynamic visual acuity (DVA)  
12 10 will be completed. The DVA will be completed with passive head movements; i.e. the examiner will  
13 11 stand behind the child and move the head of the participant in the horizontal plane with a velocity of  
14 12 2Hz. For both tests, the optotype (the letter 'E') will be randomly presented each trial at 0, 90, 180, or  
15 13 270° rotation and subjects will be asked to report the direction of the open prongs of the 'E' (right, left,  
16 14 up, down) at a distance of 3 m. The optotype size will decrease in steps equivalent to a visual acuity  
17 15 change of 0.1 LogMAR. Besides the raw scores on both test conditions, the difference between the SVA  
18 16 and the DVA score will be calculated, in order to assess the contribution of the vestibulo-ocular reflex  
19 17 during head movements. As this is mainly a functional screening, participants who wear glasses or  
20 18 contact lenses will asked to wear them during the examination.

21 19 In addition, several *practical considerations* were made to avoid the impact of the following potential  
22 20 confounding factors. To prevent fatigue or loss of attention, the assessments were spread over two  
23 21 separate test appointments and the cognitive appointment will only be performed in the morning. During  
24 22 the development of the cognitive tests, a manual response by use of a computer mouse or small buttons  
25 23 was avoided (cfr. supra) in order not to add a (difficult) motor task, which may affect the cognitive  
26 24 performances (in the vestibular-impaired) group. When group differences will be analyzed, all  
27 25 participants will be matched for the following variables: age, gender, handedness, (hearing loss) and  
28 26 randomization order of the cognitive test battery. A learning effect will be minimized as each test will  
29 27 be preceded by practice items.

30 28 Lastly, to account for other participant-related factors (e.g. physical activity, demographics, and NDD-  
31 29 comorbidities), an extensive anamnestic *questionnaire* (including questions on general information,  
32 30 general medical history, hearing, balance, vision, and motor/cognitive performance), the Flemish  
33 31 Physical Activity Questionnaire<sup>64</sup> (FPAQ), the validated Dutch translation of the American Disruptive  
34 32 Behavior Disorder rating scale (VvGK 6-16 or Vragenlijst voor Gedragsproblemen bij Kinderen<sup>65</sup>),  
35 33 Developmental Coordination Disorder Questionnaire<sup>66</sup> (DCD-Q, Dutch version), and Social  
36 34 Communication Questionnaire – Life time form<sup>67</sup> (SCQ, Dutch version) will be administered as well.

## 1 **Data collection and management**

2 The described outcome parameters will be collected by the principal investigator (RVH), who was  
3 trained to perform the pediatric motor, cognitive, and audiovestibular assessments. The research data  
4 will be gathered through observation and manual measurements during the M ABC II, visual,  
5 intelligence, and the traditional neuropsychological assessments. The outcome parameters of the  
6 audiovestibular, computerized cognitive and motor assessments will be obtained by automatic  
7 measurements of the used equipment and software. After data collection, all outcome parameters will  
8 be organized and stored by the principal investigator (RVH) in a password-protected database. In  
9 addition, the answers of the questionnaires, which will be collected with an interactive PDF document,  
10 will automatically be stored in a password-protected Excel-file. Validation checks, such as range checks  
11 for data values, were programmed to minimize the number of errors. Personal information will be  
12 pseudonymized, of which only the principal investigator and the supervisor of this project (LM) know  
13 the coding system. The information collected in this study is kept strictly confidential, and will be stored  
14 for 20 years. The (coded) data will, if possible, and in accordance with the General Data Protection  
15 Regulation (GDPR) and rules and regulations of the ethical committee and the Ghent University, be  
16 shared and/or added as supplementary material if this would be expected by the editorial board of a  
17 journal. The data collection, organization (, and analysis) procedures will not be blind since these will  
18 be performed by the same principal investigator. To optimize quality control of the collected data, a  
19 guidance team for this project was assembled, which supports the principal investigator in the data  
20 collection process, discusses the study progress, and will be consulted when problems would arise. This  
21 team consists of experts in (pediatric) audiology/vestibulology (LM), otology (ID), movement (FD),  
22 rehabilitation (HVW), and cognitive/psychological sciences (JRW), and, therefore, covers all disciplines  
23 involved in this project. No formal data management plan and/or committee have been registered.

## 24 **Statistical analysis**

25 All data will be analyzed using SPSS software (IBM Corp. Released 2017. IBM SPSS Statistics for  
26 Windows, V.26.0. Armonk, New York). The level of significance will be set at  $p = 0.05$ . The normality  
27 of the data will first be assessed using the Kolmogorov-Smirnov test, QQ plots and histograms.  
28 Normally distributed data will be presented as mean (SD) and non-normally distributed data as median  
29 (IQR). General characteristics of all participants will be described quantitatively. The data derived from  
30 questionnaires will also be presented in a quantitative way. If participants would prematurely cease their  
31 participation and would not complete one of the two appointments, they will still be included in the  
32 analyses on the outcome parameters of the first appointment. If the latter would occur, the participant  
33 will be replaced via additional recruitment to maintain the required sample size for the overall research  
34 questions and the assessment on the relation between the outcomes of both appointments. Within the  
35 typically developing group (objective 1), visual investigation and analytical analyses will be performed  
36 along with multiple linear and logistic regression analyses to determine whether participant (motor and

1  
2  
3 1 cognitive) characteristics may predict the vestibular outcome parameters, taking into account possible  
4 2 confounding factors (cfr. supra). Cross-sectional motor and cognitive results of the audiovestibular  
5 3 group (objective 2) will be studied using Fisher's exact test for categorical data, the (Paired) Student's t  
6 4 test and the Mann-Whitney U test or the Wilcoxon rank-sum test for normally and non-normally  
7 5 distributed continuous variables, respectively. In addition, correlation analyses will be performed to  
8 6 assess the association between the motor and cognitive outcome measures on the one hand, and the  
9 7 audiovestibular data on the other hand. Additionally, adjustments for potential confounders and  
10 8 subgroup analyses will be executed, if possible. In order to assess the occurrence and vestibular  
11 9 characteristics in the NDD group compared to a typically developing group (objective 3) the (Paired)  
12 10 Student's t test and variance analyses or the non-parametric alternatives in case of violation of the  
13 11 assumptions for continuous variables (e.g. VEMP amplitude and vHIT gain) will be executed.  
14 12 Categorical variables (e.g. absence/presence of VEMPs) will be analysed using the chi-square test.  
15  
16  
17  
18  
19  
20  
21  
22  
23  
24  
25  
26  
27  
28  
29  
30  
31  
32  
33  
34  
35  
36  
37  
38  
39  
40  
41  
42  
43  
44  
45  
46  
47  
48  
49  
50  
51  
52  
53  
54  
55  
56  
57  
58  
59  
60



## PATIENTS AND PUBLIC INVOLVEMENT

The research questions were developed based on problems expressed by vestibular-impaired children and their parents. They were not involved in the outcome measures, the design or implementation of the study. All participants and their parents will receive an individual report on the results of both test appointments. The results of the overall project will be sent to the communication department of Ghent University and Ghent University Hospital for a press release of the research highlights to the general public. Additionally, because of the multidisciplinary nature of the current research, the results of the study will not only be published in specialized journals, but also in more general or multidisciplinary journals, psychological and physiotherapy journals to reach a broader audience.

## ETHICS AND DISSEMINATION

Ethical approval was obtained for this test protocol at the Ghent University Hospital on June 4th 2019 (B670201940165). After written and oral explanation of the project, all participants' parents are asked to give written informed consent in accordance with the Declaration of Helsinki.

All research findings will be disseminated in peer-reviewed journals and presented at audiovestibular as well as psychological, physiotherapy or multidisciplinary international conferences.

## ACKNOWLEDGEMENT

The authors would like to acknowledge and thank all the children and their parents who participated in the Balanced Growth study until now. Additionally, the authors would like to thank Mark Schittekatte of the Ghent University (Faculty of Psychology and Educational Sciences) and Tyché Perkisas of the Antwerp University for their valuable contribution to the study design.

## AUTHORS' CONTRIBUTION

All authors substantially contributed to the article. Under the supervision and with support of Leen Maes and Frederik Deconinck, Ruth Van Hecke developed the test protocol, drafted the initial manuscript, and improved revised versions. Chloe Clauws, Maya Danneels, Laura Leyssens, Ingeborg Dhooge, Hilde Van Waelvelde, Roeljan Wiersema, Leen Maes and Frederik Deconinck critically reviewed the manuscript, supported during the creation of the Balance Growth protocol and its design, approved the final manuscript as submitted, and are accountable for all aspects of the work.

## FUNDING STATEMENT

This research received no specific grant from any funding agency in the public, commercial or not-for-profit sectors.

## COMPETING INTERESTS STATEMENT

The authors declare that the research was conducted in the absence of any commercial or financial relationships that could be construed as a potential conflict of interest.

## REFERENCES

1. Kingma H, Van de Berg R. Anatomy, physiology, and physics of the peripheral vestibular system. *Handbook of clinical neurology*: Elsevier 2016:1-16.
2. Goldberg JM, Wilson VJ, Angelaki DE, et al. The vestibular system: a sixth sense: Oxford University Press 2012.
3. Dhondt C, Van Hecke R., Dhooge I, et al. Vestibulaire revalidatie: blikstabilisatietraining voor kinderen 2020.
4. Strupp M, Feil K, Dieterich M, et al. Bilateral vestibulopathy. *Handbook of clinical neurology*: Elsevier 2016:235-40.
5. Herdman SJ, Blatt P, Schubert MC, et al. Falls in patients with vestibular deficits. *Otology & Neurotology* 2000;21(6):847-51.
6. Herssens N, Verbecque E, McCrum C, et al. A Systematic Review on Balance Performance in Patients With Bilateral Vestibulopathy. *Physical Therapy* 2020
7. Meldrum D, Jahn K. Gaze stabilisation exercises in vestibular rehabilitation: review of the evidence and recent clinical advances. *Journal of neurology* 2019:1-8.
8. Melo RS, Lemos A, Paiva GS, et al. Vestibular rehabilitation exercises programs to improve the postural control, balance and gait of children with sensorineural hearing loss: A systematic review. *International Journal of Pediatric Otorhinolaryngology* 2019;127:109650.
9. Inoue A, Iwasaki S, Ushio M, et al. Effect of vestibular dysfunction on the development of gross motor function in children with profound hearing loss. *Audiology and Neurotology* 2013;18(3):143-51.
10. Kaga K, Shinjo Y, Jin Y, et al. Vestibular failure in children with congenital deafness. *International journal of audiology* 2008;47(9):590-99.
11. Rapin I. Hypoactive labyrinths and motor development. *Clinical Pediatrics* 1974;13(11):922-37.
12. Horak FB, Shumway-Cook A, Crowe TK, et al. Vestibular function and motor proficiency of children with impaired hearing, or with learning disability and motor impairments. *Developmental Medicine & Child Neurology* 1988;30(1):64-79.
13. Crowe TK, Horak FB. Motor proficiency associated with vestibular deficits in children with hearing impairments. *Physical therapy* 1988;68(10):1493-99.
14. Rine RM, Cornwall G, Gan K, et al. Evidence of progressive delay of motor development in children with sensorineural hearing loss and concurrent vestibular dysfunction. *Perceptual and motor skills* 2000;90(3\_suppl):1101-12.
15. Shall MS. The importance of saccular function to motor development in children with hearing impairments. *International journal of otology* 2009;2009
16. Jafari Z, Malayeri SA. The effect of saccular function on static balance ability of profound hearing-impaired children. *International journal of pediatric otorhinolaryngology* 2011;75(7):919-24.
17. Maes L, De Kegel A, Van Waelvelde H, et al. Comparison of the motor performance and vestibular function in infants with a congenital cytomegalovirus infection or a connexin 26 mutation: a preliminary study. *Ear and hearing* 2017;38(1):e49-e56.
18. Ionescu E, Reynard P, Goulème N, et al. How sacculo-colic function assessed by cervical vestibular evoked myogenic Potentials correlates with the quality of postural control in hearing impaired children? *International Journal of Pediatric Otorhinolaryngology* 2020;130:109840.
19. Janky K, Givens D. Vestibular, visual acuity and balance outcomes in children with cochlear implants: a preliminary report. *Ear and hearing* 2015;36(6):e364.
20. Maes L, De Kegel A, Van Waelvelde H, et al. Association between vestibular function and motor performance in hearing-impaired children. *Otology & Neurotology* 2014;35(10):e343-e47.
21. Oyewumi M, Wolter NE, Heon E, et al. Using balance function to screen for vestibular impairment in children with sensorineural hearing loss and cochlear implants. *Otology & Neurotology* 2016;37(7):926-32.
22. De Kegel A, Maes L, Van Waelvelde H, et al. Examining the impact of cochlear implantation on the early gross motor development of children with a hearing loss. *Ear and Hearing* 2015;36(3):e113-e21.

- 1 23. Cushing SL, Papsin BC, Rutka JA, et al. Vestibular end-organ and balance deficits after meningitis  
2 and cochlear implantation in children correlate poorly with functional outcome. *Otology &*  
3 *Neurotology* 2009;30(4):488-95.
- 4 24. Sokolov M, Gordon KA, Polonenko M, et al. Vestibular and balance function is often impaired in  
5 children with profound unilateral sensorineural hearing loss. *Hearing research* 2019;372:52-61.
- 6 25. Hall CD, Herdman SJ, Whitney SL, et al. Vestibular rehabilitation for peripheral vestibular  
7 hypofunction: an evidence-based clinical practice guideline: from the American physical  
8 therapy association neurology section. *Journal of Neurologic Physical Therapy* 2016;40(2):124.
- 9 26. Rine RM, Braswell J, Fisher D, et al. Improvement of motor development and postural control  
10 following intervention in children with sensorineural hearing loss and vestibular impairment.  
11 *International journal of pediatric otorhinolaryngology* 2004;68(9):1141-48.
- 12 27. Bigelow RT, Agrawal Y. Vestibular involvement in cognition: Visuospatial ability, attention,  
13 executive function, and memory. *Journal of Vestibular Research* 2015;25(2):73-89.
- 14 28. Smith PF. The vestibular system and cognition. *Current opinion in neurology* 2017;30(1):84-89.
- 15 29. Hitier M, Besnard S, Smith PF. Vestibular pathways involved in cognition. *Frontiers in integrative*  
16 *neuroscience* 2014;8:59.
- 17 30. Besnard S, Lopez C, Brandt T, et al. The vestibular system in cognitive and memory processes in  
18 mammals. *Frontiers in Integrative Neuroscience* 2015;9:55.
- 19 31. Van Hecke R, Danneels M, Dhooge I, et al. Vestibular function in children with neurodevelopmental  
20 disorders: a systematic review. *Journal of autism and developmental disorders*  
21 2019;49(8):3328-50.
- 22 32. Lacroix E, Edwards MG, De Volder A, et al. Neuropsychological profiles of children with vestibular  
23 loss. *Journal of Vestibular Research* 2020(Preprint):1-9.
- 24 33. Wiener-Vacher SR, Hamilton DA, Wiener SI. Vestibular activity and cognitive development in  
25 children: perspectives. *Frontiers in integrative neuroscience* 2013;7:92.
- 26 34. Braswell J, Rine RM. Evidence that vestibular hypofunction affects reading acuity in children.  
27 *International journal of pediatric otorhinolaryngology* 2006;70(11):1957-65.
- 28 35. Lucieer F, Van Hecke R, van Stiphout L, et al. Bilateral vestibulopathy: beyond imbalance and  
29 oscillopsia. *Journal of Neurology* 2020:1-15.
- 30 36. Deroualle D, Lopez C. Toward a vestibular contribution to social cognition. *Frontiers in Integrative*  
31 *Neuroscience* 2014;8:16.
- 32 37. Gurvich C, Maller JJ, Lithgow B, et al. Vestibular insights into cognition and psychiatry. *brain*  
33 *research* 2013;1537:244-59.
- 34 38. Le Gall A, Hilber P, Chesneau C, et al. The critical role of vestibular graviception during cognitive-  
35 motor development. *Behavioural Brain Research* 2019;372:112040.
- 36 39. Popp P, Wulff M, Finke K, et al. Cognitive deficits in patients with a chronic vestibular failure.  
37 *Journal of neurology* 2017;264(3):554-63.
- 38 40. Ferrè ER, Haggard P. Vestibular cognition: State-of-the-art and future directions. *Cognitive*  
39 *Neuropsychology* 2020:1-8.
- 40 41. Danneels M, Van Hecke R, Leyssens L, et al. 2BALANCE: a cognitive-motor dual-task protocol  
41 for individuals with vestibular dysfunction. *BMJ open* 2020;10(7):e037138.
- 42 42. Danneels M, Van Hecke R, Keppler H, et al. Psychometric properties of cognitive-motor dual-task  
43 studies with the aim of developing a test protocol for persons with vestibular disorders: a  
44 systematic review. *Ear and hearing* 2020;41(1):3-16.
- 45 43. Stins JF, Emck C. Balance performance in autism: A brief overview. *Frontiers in psychology*  
46 2018;9:901.
- 47 44. Inder JM, Sullivan SJ. Motor and postural response profiles of four children with developmental  
48 coordination disorder. *Pediatric Physical Therapy* 2005;17(1):18-29.
- 49 45. Deconinck FJ, De Clercq D, Van Coster R, et al. Sensory contributions to balance in boys with  
50 developmental coordination disorder. *Adapted Physical Activity Quarterly* 2008;25(1):17-35.
- 51 46. Buderath P, Gärtner K, Frings M, et al. Postural and gait performance in children with attention  
52 deficit/hyperactivity disorder. *Gait & posture* 2009;29(2):249-54.
- 53 47. Association AP. Diagnostic and statistical manual of mental disorders (DSM-5®): American  
54 Psychiatric Pub 2013.

- 1  
2  
3 1 48. Lotfi Y, Rezazadeh N, Moossavi A, et al. Rotational and collic vestibular-evoked myogenic potential  
4 2 testing in normal developing children and children with combined attention deficit/hyperactivity  
5 3 disorder. *Ear and hearing* 2017;38(6):e352-e58.  
6 4 49. MacDougall HG, McGarvie LA, Halmagyi GM, et al. A new saccadic indicator of peripheral  
7 5 vestibular function based on the video head impulse test. *Neurology* 2016;87(4):410-18.  
8 6 50. Leysens L, Van Hecke R, Moons K, et al. Vestibular function in adults with intellectual disabilities:  
9 7 feasibility and outcome of a vestibular screening protocol in Special Olympics athletes.  
10 8 *International Journal of Audiology* 2020:1-12.  
11 9 51. Vanspauwen R, Wuyts FL, Krijger S, et al. Comparison of different electrode configurations for the  
12 10 oVEMP with bone-conducted vibration. *Ear and hearing* 2017;38(2):205-11.  
13 11 52. Dhondt C, Dhooge I, Maes L. Vestibular assessment in the pediatric population. *Laryngoscope*  
14 12 2019;129(2):490-93.  
15 13 53. Maes L, Dhooge I, De Vel E, et al. Normative data and test-retest reliability of the sinusoidal  
16 14 harmonic acceleration test, pseudorandom rotation test and velocity step test. *Journal of*  
17 15 *Vestibular Research* 2008;18(4):197-208.  
18 16 54. Henderson S, Sugden D, Barnett A. Movement Assessment Battery for Children-2 (Dutch Manual):  
19 17 Pearson Assessment, London, UK, 2007.  
20 18 55. Kiphard EJ, Schilling F. Körperkoordinationstest für kinder: KTK: Beltz-Test 2007.  
21 19 56. Cohen H, Blatchly CA, Gombash LL. A study of the clinical test of sensory interaction and balance.  
22 20 *Physical therapy* 1993;73(6):346-51.  
23 21 57. Cooper J, Siegfried K, Ahmed A. BrainBLoX: Brain and Biomechanics Lab in a Box Software:  
24 22 Version, 2014.  
25 23 58. Mueller ST, Piper BJ. The psychology experiment building language (PEBL) and PEBL test battery.  
26 24 *Journal of neuroscience methods* 2014;222:250-59.  
27 25 59. Korkman M, Kirk U, Kemp S. NEPSY II: Clinical and interpretive manual: Harcourt Assessment,  
28 26 PsychCorp 2007.  
29 27 60. Zijlstra H, Kingma A, Swaab H, et al. Nepsy-II-nl. *Enschede: Ipskamp* 2010  
30 28 61. Stanislaw H, Todorov N. Calculation of signal detection theory measures. *Behavior research*  
31 29 *methods, instruments, & computers* 1999;31(1):137-49.  
32 30 62. Beery KE, Buktenica NA, Beery NA. The Beery-Buktenica developmental test of visual-motor  
33 31 integration: Administration, scoring, and teaching manual (6th ed.): Minneapolis: NCS Pearson,  
34 32 Inc. 2010.  
35 33 63. Aubry A, Bourdin B. Short Forms of Wechsler scales assessing the intellectually gifted children  
36 34 using simulation data. *Frontiers in psychology* 2018;9:830.  
37 35 64. Philippaerts R, Matton L, Wijndaele K, et al. Validity of a physical activity computer questionnaire  
38 36 in 12-to 18-year-old boys and girls. *International journal of sports medicine* 2006;27(02):131-  
39 37 36.  
40 38 65. Oosterlaan J, Baeyens D, Scheres A, et al. VvGK 6–16 vragenlijst voor gedragsproblemen bij  
41 39 kinderen 6–16 jaar. handleiding: Amsterdam: Pearson Assessment and Information BV, 2008.  
42 40 66. Wilson BN, Kaplan BJ, Crawford SG, et al. Reliability and validity of a parent questionnaire on  
43 41 childhood motor skills. *American Journal of Occupational Therapy* 2000;54(5):484-93.  
44 42 67. Rutter M, Bailey A, Lord C. The social communication questionnaire: Manual: Western  
45 43 Psychological Services 2003.  
46  
47  
48  
49 44  
50  
51 45  
52  
53  
54  
55  
56  
57  
58  
59  
60







Figure 1. The vestibular system and its most important input and output structures. After permission of the authors the figure was adapted and translated from Dhondt et al. (2020).

76x98mm (300 x 300 DPI)

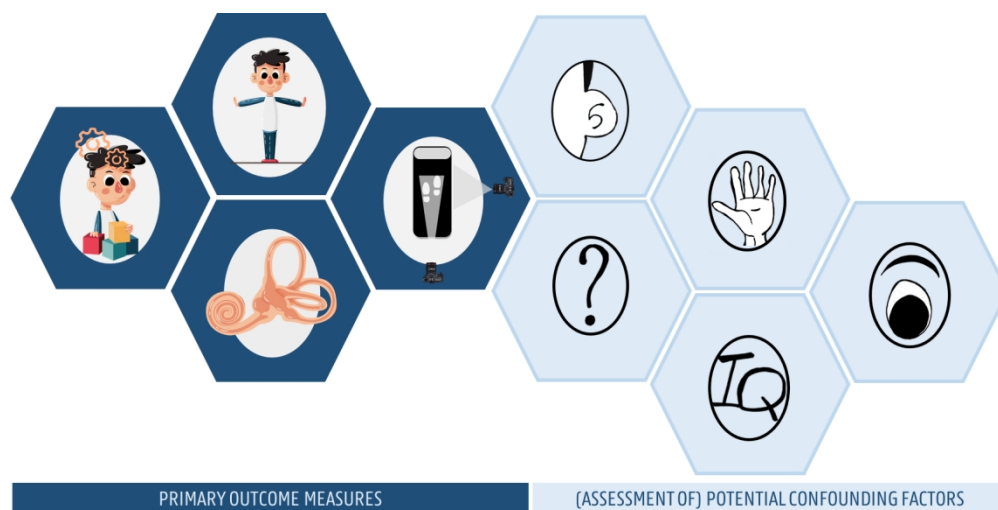

Figure 2. The Balanced Growth protocol including vestibular, cognitive, motor, and cognitive-motor interaction assessments, and also several additional screenings to control for potential confounding factors.

145x74mm (300 x 300 DPI)

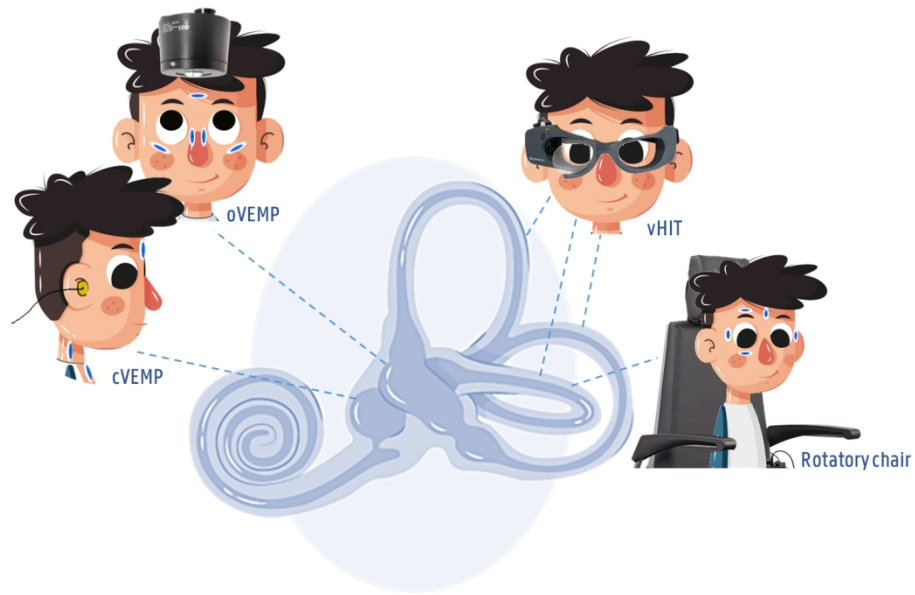

Figure 3. Vestibular test battery of the Balanced Growth protocol. c/oVEMP = a cervical (air-conduction) and ocular (using a minishaker) Vestibular Evoked Myogenic Potential assessment; vHIT = video Head Impulse Test in all planes of the semicircular canals (lateral, anterior, posterior).

139x85mm (300 x 300 DPI)



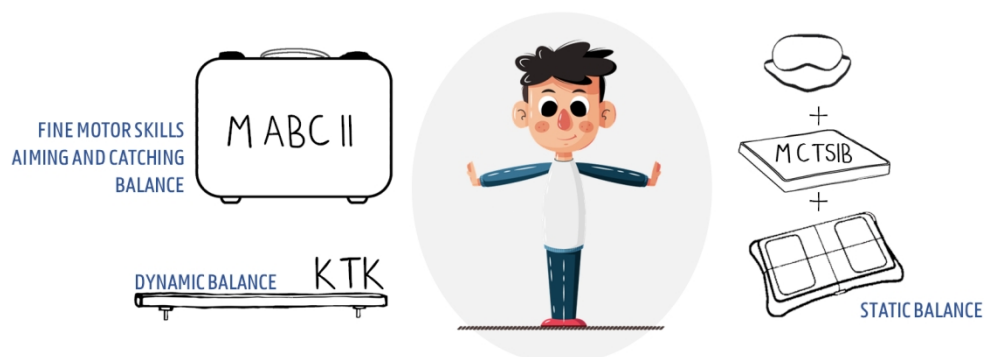

Figure 4. Motor and balance test battery of the Balanced Growth protocol, which includes the motor assessment battery for children (M ABC, 2nd edition), the first subtest of the Körperkoordination Test für Kinder (KTK, backward balance beam walking), and the modified Clinical Test of Sensory Interaction on Balance (m-CTSIB) performed on a Wii Balance Board.

139x58mm (300 x 300 DPI)

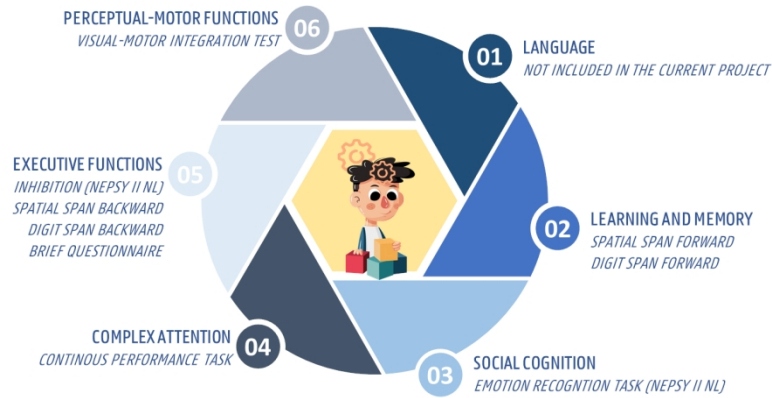

Figure 5. The extensive cognitive test battery of the Balanced Growth protocol based on the six neurocognitive domains of the DSM-5; NEPSY II NL = Developmental Neuropsychological Assessment, Second Edition, Dutch version, BRIEF = the parent-report questionnaire Behaviour Rating Inventory of Executive Function.

158x64mm (300 x 300 DPI)

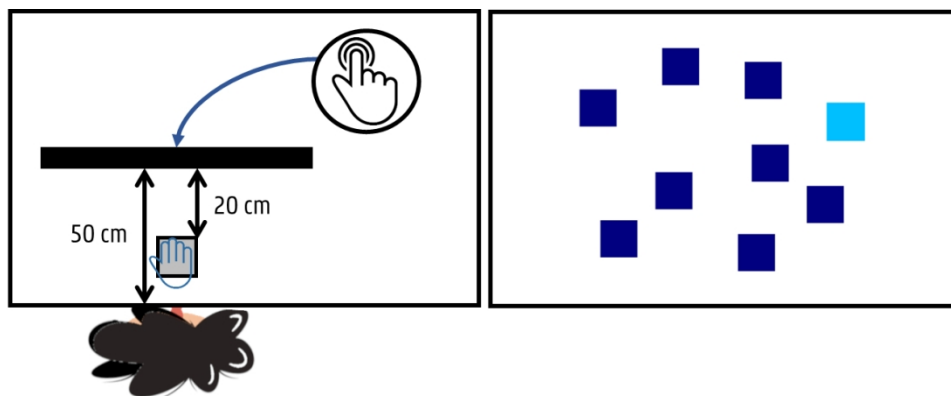

Figure 6. Test set up, including a touch screen monitor, for the spatial span task (forward/backward).

117x51mm (300 x 300 DPI)

1  
2  
3  
4  
5  
6  
7  
8  
9  
10  
11  
12  
13  
14  
15  
16  
17  
18  
19  
20  
21  
22  
23  
24  
25  
26  
27  
28  
29  
30  
31  
32  
33  
34  
35  
36  
37  
38  
39  
40  
41  
42  
43  
44  
45  
46  
47  
48  
49  
50  
51  
52  
53  
54  
55  
56  
57  
58  
59  
60

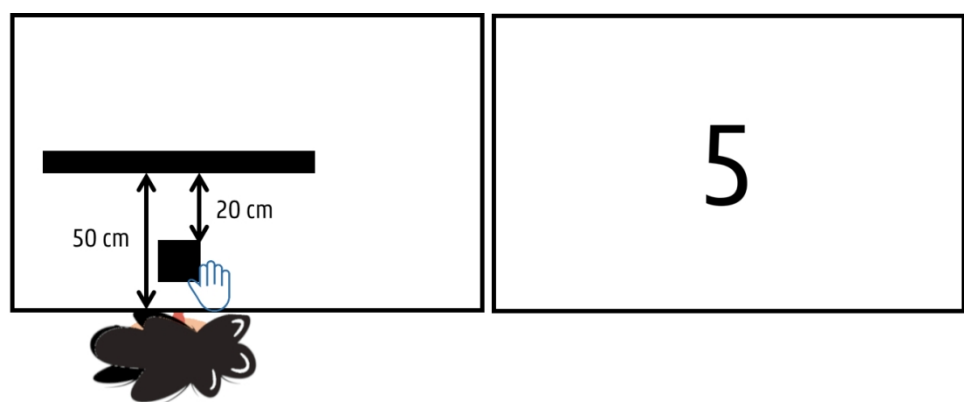

Figure 7. Test set up for the digit span (forward/backward) and continuous performance task.  
116x48mm (300 x 300 DPI)

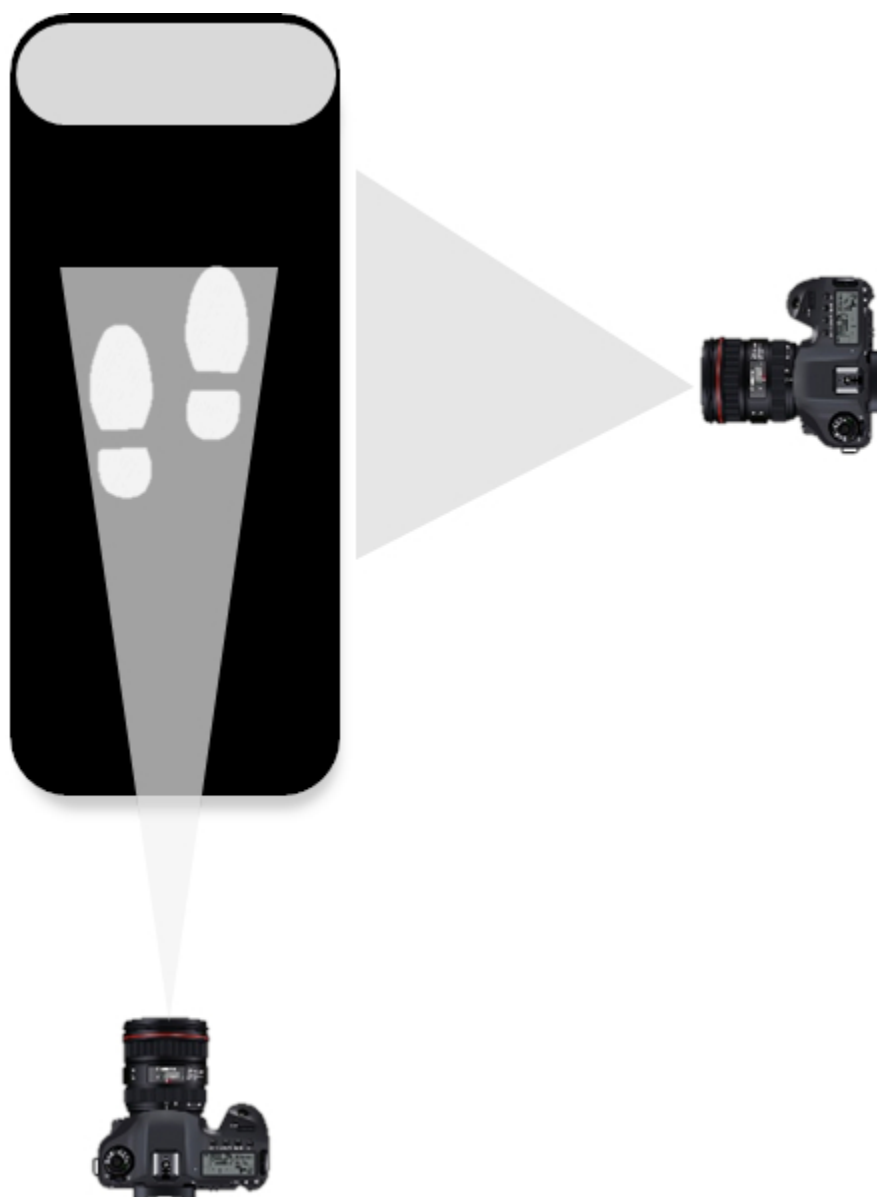

Figure 8. Test set up for the cognitive-motor interference assessment of the Balanced Growth project.

37x50mm (300 x 300 DPI)

# Standard Protocol Items for Observational Studies (SPIROS)

| Section and topic                   | Description / sub-categories                                                                                                                                         | Addressed on page number                         |
|-------------------------------------|----------------------------------------------------------------------------------------------------------------------------------------------------------------------|--------------------------------------------------|
| <b>i) General Information</b>       |                                                                                                                                                                      |                                                  |
| Title                               | Descriptive title identifying study design                                                                                                                           | 1                                                |
| Protocol version                    | Version or amendment number and date and summary of changes                                                                                                          | NA following the preferred format of the journal |
| Protocol summary                    | Brief summary of protocol research                                                                                                                                   | 2                                                |
| Sponsor and partner institute name  | Name of sponsor and participating institutes (if applicable)                                                                                                         | NA                                               |
| Investigators name                  | Name of principal and co investigators.                                                                                                                              | 1, 17                                            |
| Affiliation of investigators        | Affiliated institutions of investigators                                                                                                                             | 1                                                |
| Principal researcher contact detail | Name, email address, affiliation of Principal researcher for correspondence.                                                                                         | 1                                                |
| Table of content                    | Table of content                                                                                                                                                     | NA following the preferred format of the journal |
| List of Abbreviations               | A detailed List of all abbreviations used in protocol with full form.                                                                                                | NA following the preferred format of the journal |
| <b>ii) Introduction</b>             |                                                                                                                                                                      |                                                  |
| Background of study                 | Scientific background of study                                                                                                                                       | 4-5                                              |
| Review of prior research            | Summary of all previous relevant research                                                                                                                            | 4-5                                              |
| Rationale of study                  | Justification for conducting the study                                                                                                                               | 4-5                                              |
| Aim                                 | Broader aims and specific objectives of the study                                                                                                                    | 5                                                |
| Objective of study                  | Primary and secondary objectives of study                                                                                                                            | 5                                                |
| <b>iii) Methods</b>                 |                                                                                                                                                                      |                                                  |
| Study design                        | Description of type/design of study                                                                                                                                  | 7                                                |
| Study setting                       | Description of setting, locations, relevant dates, including periods of recruitment/survey, exposure, follow-up, and data collection.<br>Schedule of study procedure | 7                                                |

|                                                                                                                   |                              |                                                                                                                                                                                                                                                                                                                                                                                                                                                                                                                                                                                                                                                |            |
|-------------------------------------------------------------------------------------------------------------------|------------------------------|------------------------------------------------------------------------------------------------------------------------------------------------------------------------------------------------------------------------------------------------------------------------------------------------------------------------------------------------------------------------------------------------------------------------------------------------------------------------------------------------------------------------------------------------------------------------------------------------------------------------------------------------|------------|
| 1<br>2<br>3<br>4<br>5<br>6<br>7<br>8<br>9<br>10<br>11<br>12<br>13<br>14<br>15<br>16<br>17<br>18<br>19<br>20<br>21 | Sample size                  | Estimated number, calculation and assumptions<br>Power calculation                                                                                                                                                                                                                                                                                                                                                                                                                                                                                                                                                                             | 8-9        |
| 22<br>23<br>24<br>25<br>26<br>27                                                                                  | Sampling procedure           | Description of sampling strategy to ensure representativeness and control of potential bias                                                                                                                                                                                                                                                                                                                                                                                                                                                                                                                                                    | 7-8        |
| 28<br>29<br>30<br>31<br>32<br>33<br>34<br>35                                                                      | Participants                 | <p><b>Cohort study</b>—eligibility criteria, and the sources and methods of selection of participants. Describe methods of follow-up.<br/>For matched studies, give matching criteria and number of exposed and unexposed</p> <p><b>Case-control study</b>—Give the eligibility criteria, and the sources and methods of case ascertainment and control selection. Give the rationale for the choice of cases and controls<br/>For matched studies, give matching criteria and the number of controls per case</p> <p><b>Cross-sectional study</b>—Give the eligibility criteria, and the sources and methods of selection of participants</p> | 7-8        |
| 36<br>37<br>38<br>39<br>40<br>41<br>42<br>43<br>44<br>45<br>46                                                    | Variables                    | <ul style="list-style-type: none"> <li>• All outcomes</li> <li>• Exposures- definition of exposure of interest</li> <li>• Predictors</li> <li>• Potential confounders</li> <li>• Effect modifiers</li> </ul>                                                                                                                                                                                                                                                                                                                                                                                                                                   | 9-16       |
|                                                                                                                   | Data Sources/<br>Measurement | <p>For each variable of interest, give sources of data and details of methods of assessment (measurement).</p> <p>Describe comparability of assessment methods if there is more than one group</p> <p>Data collection points</p> <p>Blinding procedure</p>                                                                                                                                                                                                                                                                                                                                                                                     | 7, 9-17    |
|                                                                                                                   | Bias                         | <p>Describe any efforts to address potential sources of bias</p> <p>More specifically</p> <ul style="list-style-type: none"> <li>• Information bias</li> <li>• Selection Bias</li> <li>• Control for confounding</li> </ul>                                                                                                                                                                                                                                                                                                                                                                                                                    | 7-8, 15-16 |



|                                                                |                                               |                                                                                                                                                                                                                                                                                                                            |       |
|----------------------------------------------------------------|-----------------------------------------------|----------------------------------------------------------------------------------------------------------------------------------------------------------------------------------------------------------------------------------------------------------------------------------------------------------------------------|-------|
| 1<br>2<br>3<br>4                                               | Statistical analysis plan                     | Method of primary / secondary outcomes and additional analysis<br>Handling of missing data<br>Post-hoc analysis                                                                                                                                                                                                            | 17    |
| 5<br>6<br>7<br>8                                               | Handling of withdrawals and lost to follow up | Describe the procedures to be followed when a participant ceases participation in the study prematurely or is lost to follow-up                                                                                                                                                                                            | 17    |
| 9<br>10<br>11<br>12                                            | Replacements                                  | Provide information on whether or not participants who discontinue the study will be replaced via additional recruitment to maintain the required sample size.                                                                                                                                                             | 17    |
| 13<br>14<br>15                                                 | Outcome                                       | Define and describe all primary and secondary outcome                                                                                                                                                                                                                                                                      | 9-16  |
| 16<br>17<br>18<br>19<br>20<br>21<br>22<br>23<br>24<br>25<br>26 | Database management                           | Detailed plan of database management including: <ul style="list-style-type: none"> <li>• Data collection (electronic or paper based)</li> <li>• Source data</li> <li>• Data entry</li> <li>• Data editing</li> <li>• Coding</li> <li>• Data storage</li> <li>• Record retention</li> <li>• Data confidentiality</li> </ul> | 16-17 |
| 27<br>28<br>29                                                 | Validation of instrument                      | Reliability / validity of instrument or plan to establish validation                                                                                                                                                                                                                                                       | 9-16  |
| 30                                                             | Follow up                                     | Plan of follow up and addressing lost to follow up                                                                                                                                                                                                                                                                         | NA    |
| 31<br>32<br>33<br>34                                           | Quality control                               | <ul style="list-style-type: none"> <li>• Method of quality control</li> <li>• Monitoring (internal and external)</li> <li>• Training of surveyors</li> </ul>                                                                                                                                                               | 16-17 |
| 35<br>36                                                       | Quality assurance                             | Plan of quality assurance                                                                                                                                                                                                                                                                                                  | 16-17 |
| 37                                                             | <b>iv) Ethical consideration</b>              |                                                                                                                                                                                                                                                                                                                            |       |
| 38<br>39<br>40                                                 | Ethical approval                              | Weather it has been obtained and name of ethical committees.<br>If approval not sought , Reason                                                                                                                                                                                                                            | 18    |
| 41<br>42<br>43<br>44<br>45<br>46                               | Agreement and consent                         | Method of taking consent. Reason if consent not sought                                                                                                                                                                                                                                                                     | 9, 18 |

|                                                  |                                                                                                                     |                                                  |
|--------------------------------------------------|---------------------------------------------------------------------------------------------------------------------|--------------------------------------------------|
| Risk / Harm to participants                      | Any potential risk or harm to study participants                                                                    | NA                                               |
| Adverse event and Severe adverse event reporting | Outline how Adverse Event and Severe adverse event information will be collected.                                   | NA                                               |
| <b>v) Reporting and dissemination</b>            |                                                                                                                     |                                                  |
| Protocol amendments                              | Methods of communicating to investigators/IRBs and documenting                                                      | 16-17                                            |
| Dissemination                                    | How results will be disseminated to participants, practitioners, public                                             | 18                                               |
| Publication Plan                                 | Who has right to publish; restrictions; authorship guidelines<br>Open Access                                        | NA following the preferred format of the journal |
| Reporting of early stopping                      | Dissemination of results if trial is stopped early (for any reason)                                                 | NA                                               |
| <b>vi) Others</b>                                |                                                                                                                     |                                                  |
| Limitations                                      | Limitations of proposed study                                                                                       | 3                                                |
| Strength of study                                | Highlight strengths of proposed study                                                                               | 3                                                |
| References                                       | List of references cited in protocol                                                                                | 20-22                                            |
| Funding                                          | Source of funding and the role of the funders for the present study                                                 | 18                                               |
| Acknowledgement for protocol development         | Acknowledgement of persons involved in protocol preparation                                                         | 18                                               |
| Data sharing policy                              | To describe how data will be made available in public domain.                                                       | 16-17                                            |
| Contributions of authors to protocol             | Listed authors should have participated sufficiently in preparation of protocol with details of their contribution. | 18                                               |
| Trial registry                                   | For observational studies also registered as trial                                                                  | 2                                                |
